# Supplementary material
Source: MDPI journal article supplement (https://www.mdpi.com/2673-401X/3/2/9)

# Supporting Information

## Acid Catalyzed *N*-Alkylation of Pyrazoles with Trichloroacetimidates

*Rowan I. L. Meador, Nilamber A. Mate and John D. Chisholm\**

Department of Chemistry, Syracuse University, 1-014 Center for Science and Technology, Syracuse, NY

13244

*jdchisho@syr.edu*

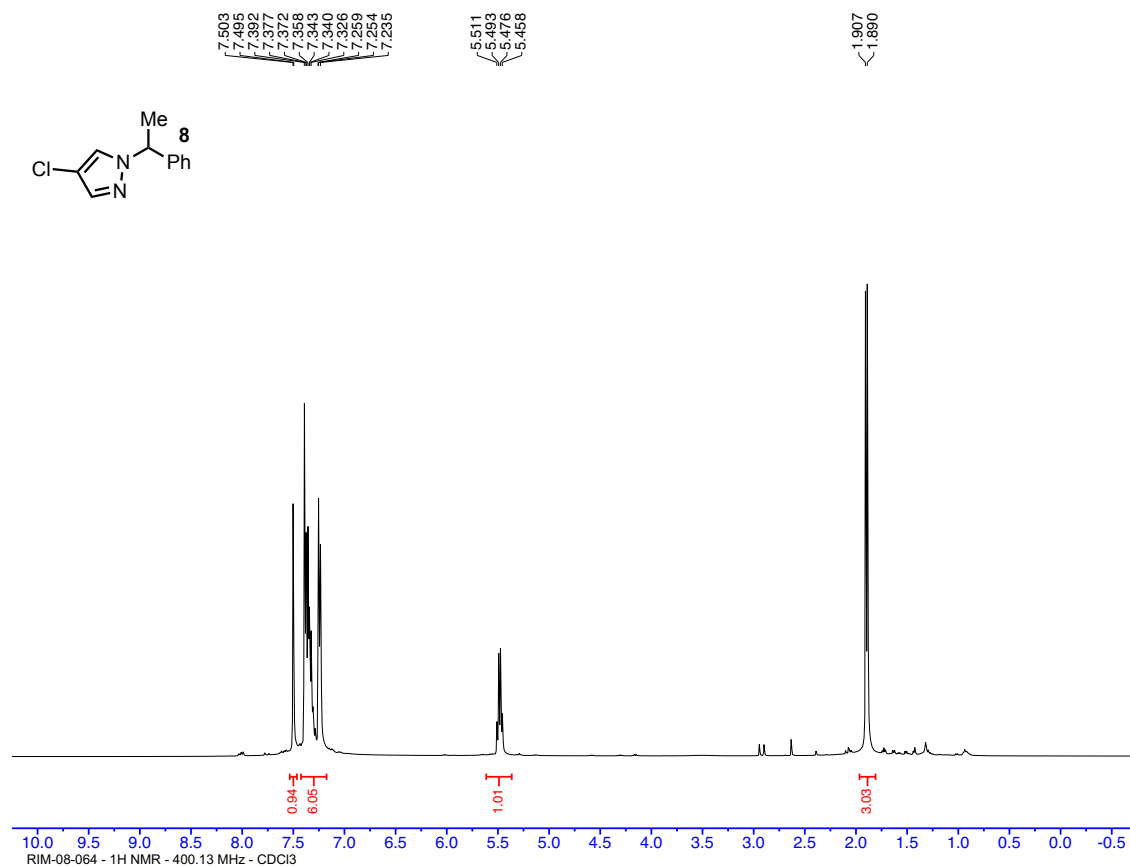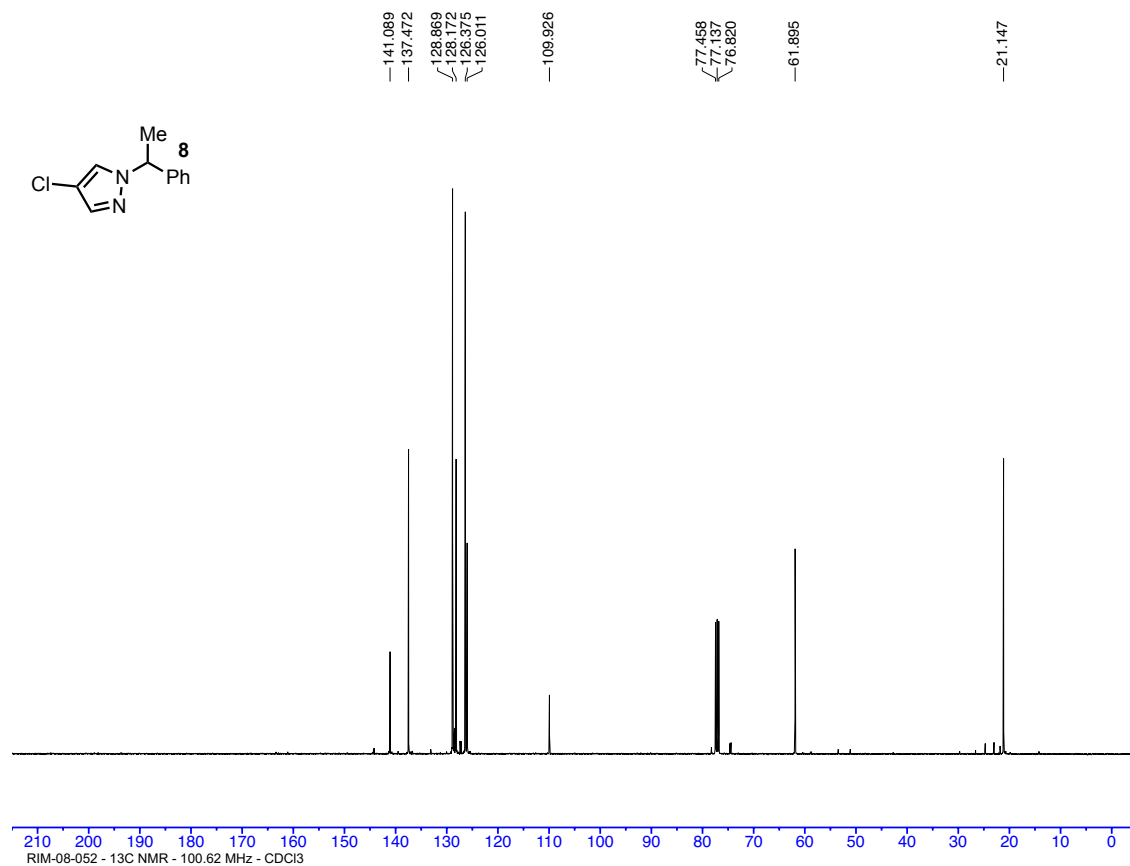

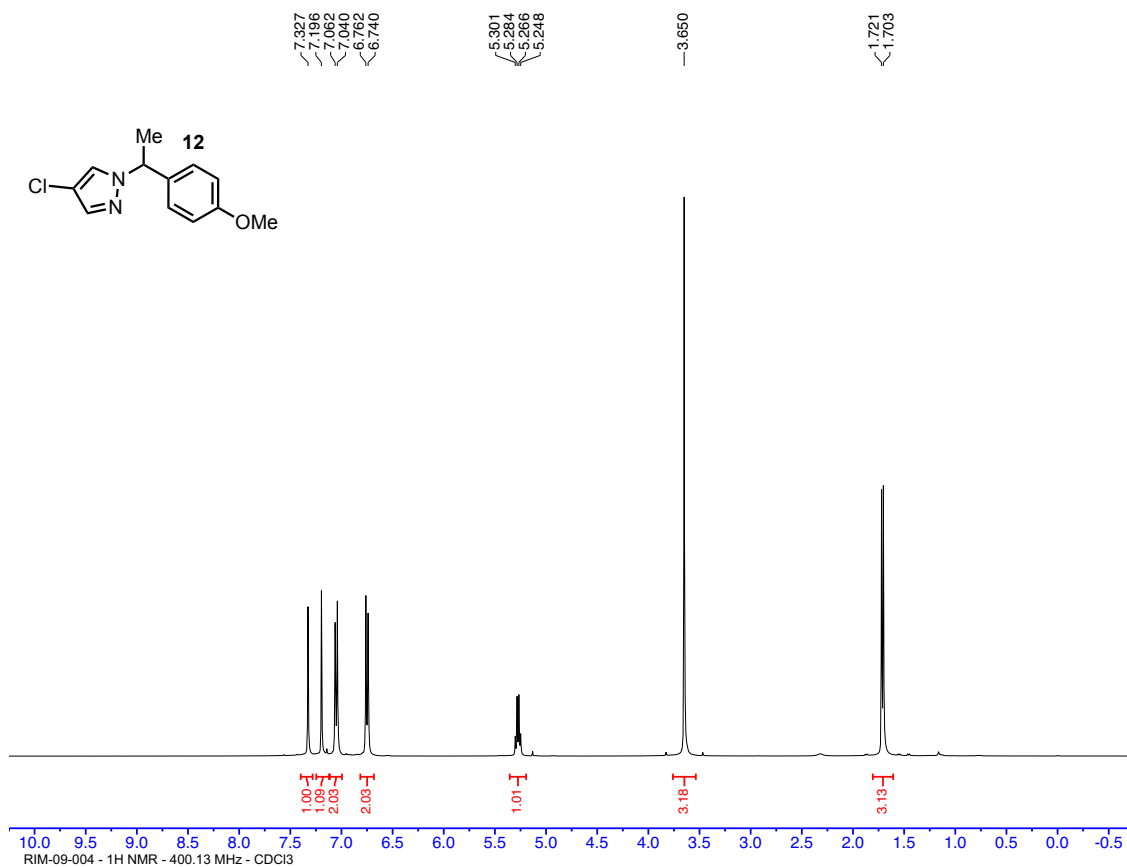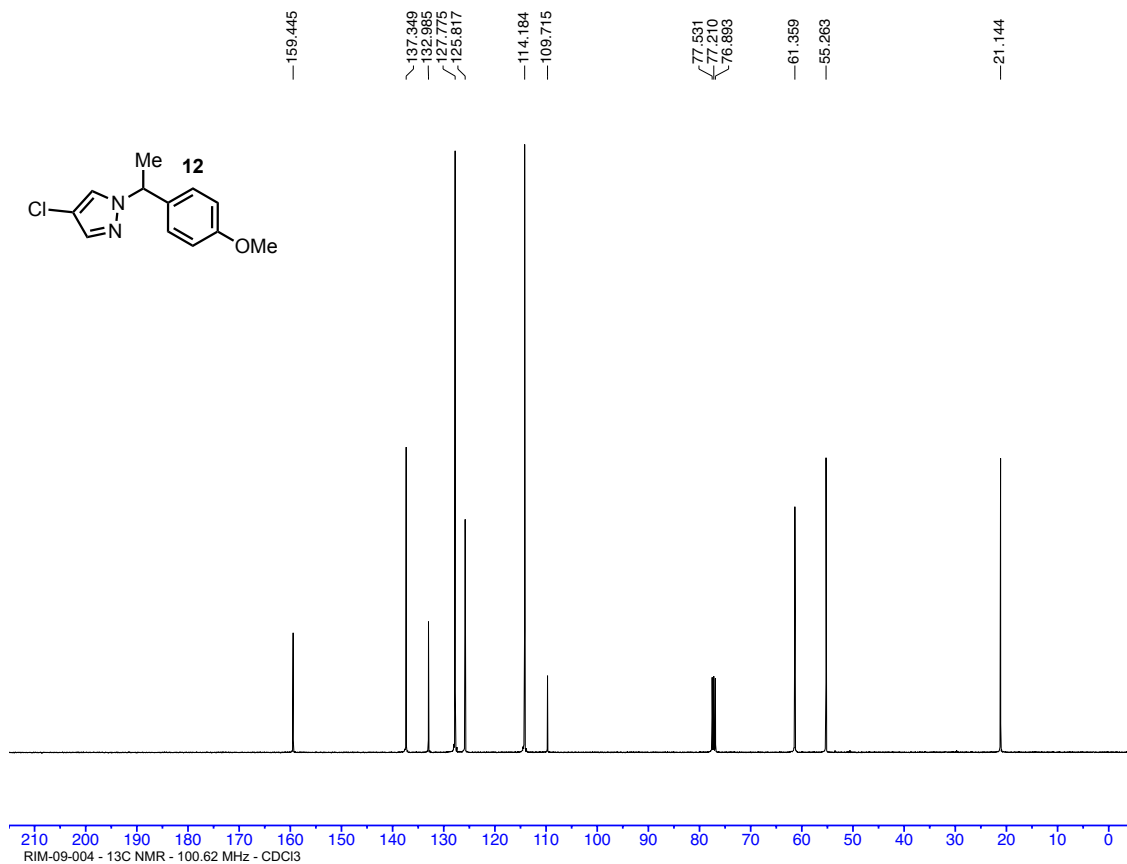

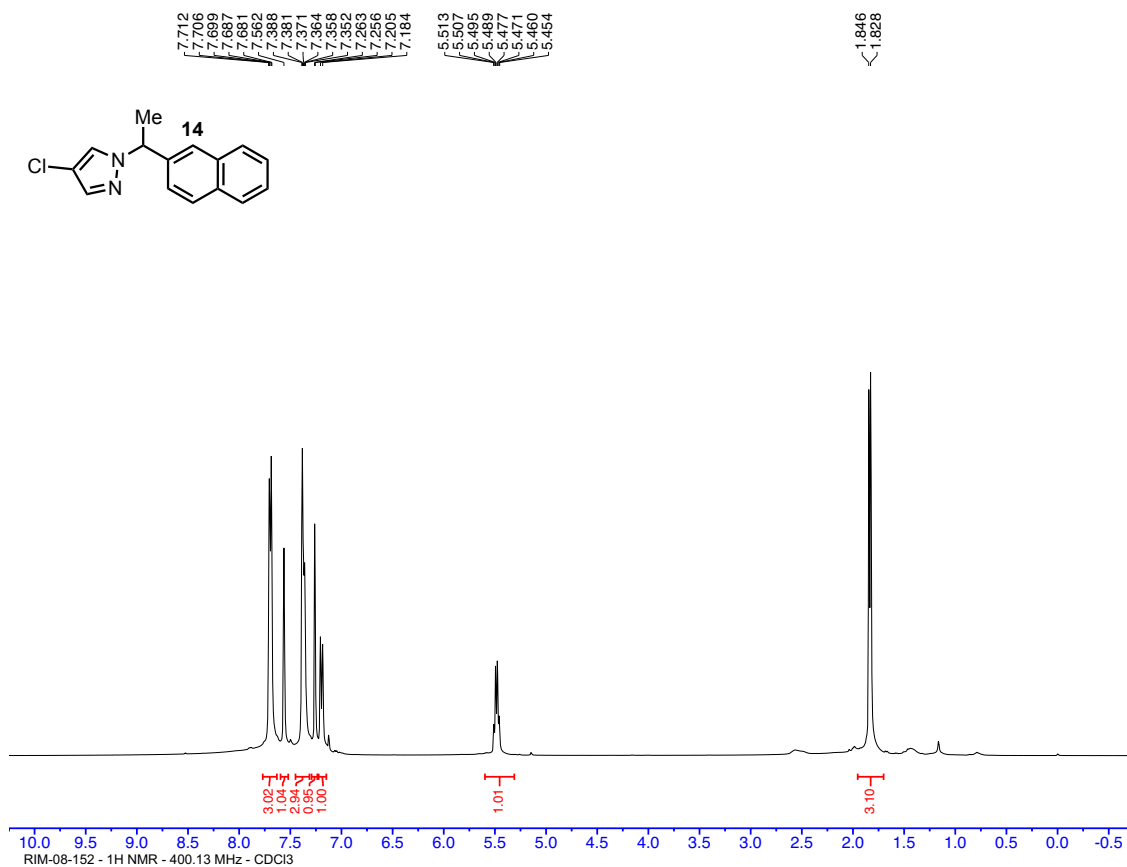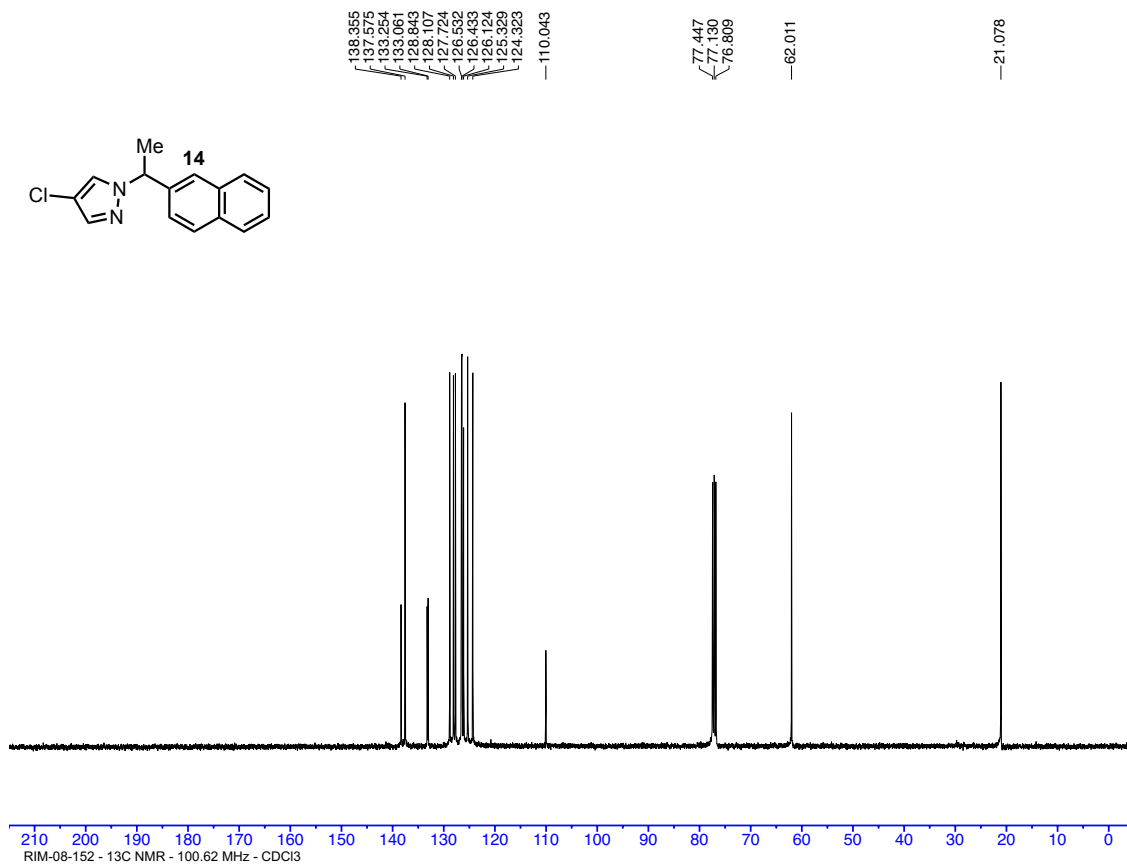

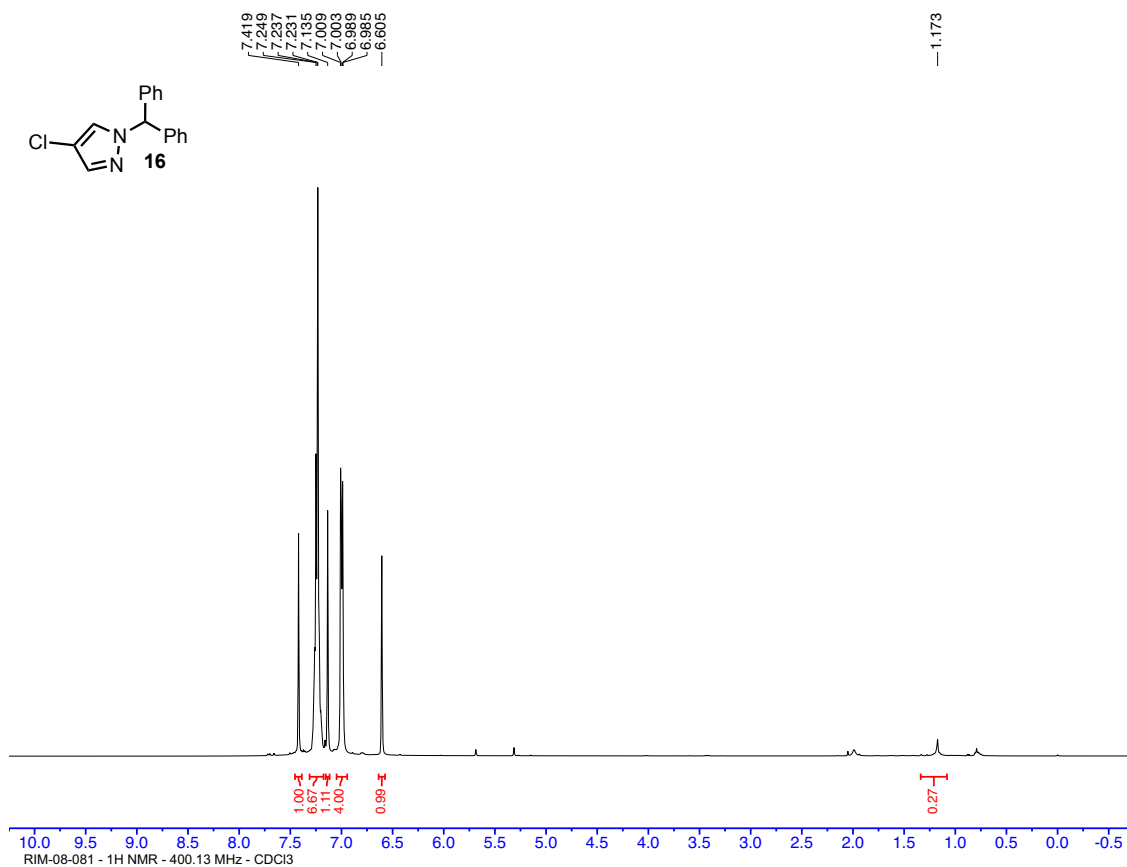

RIM-08-081

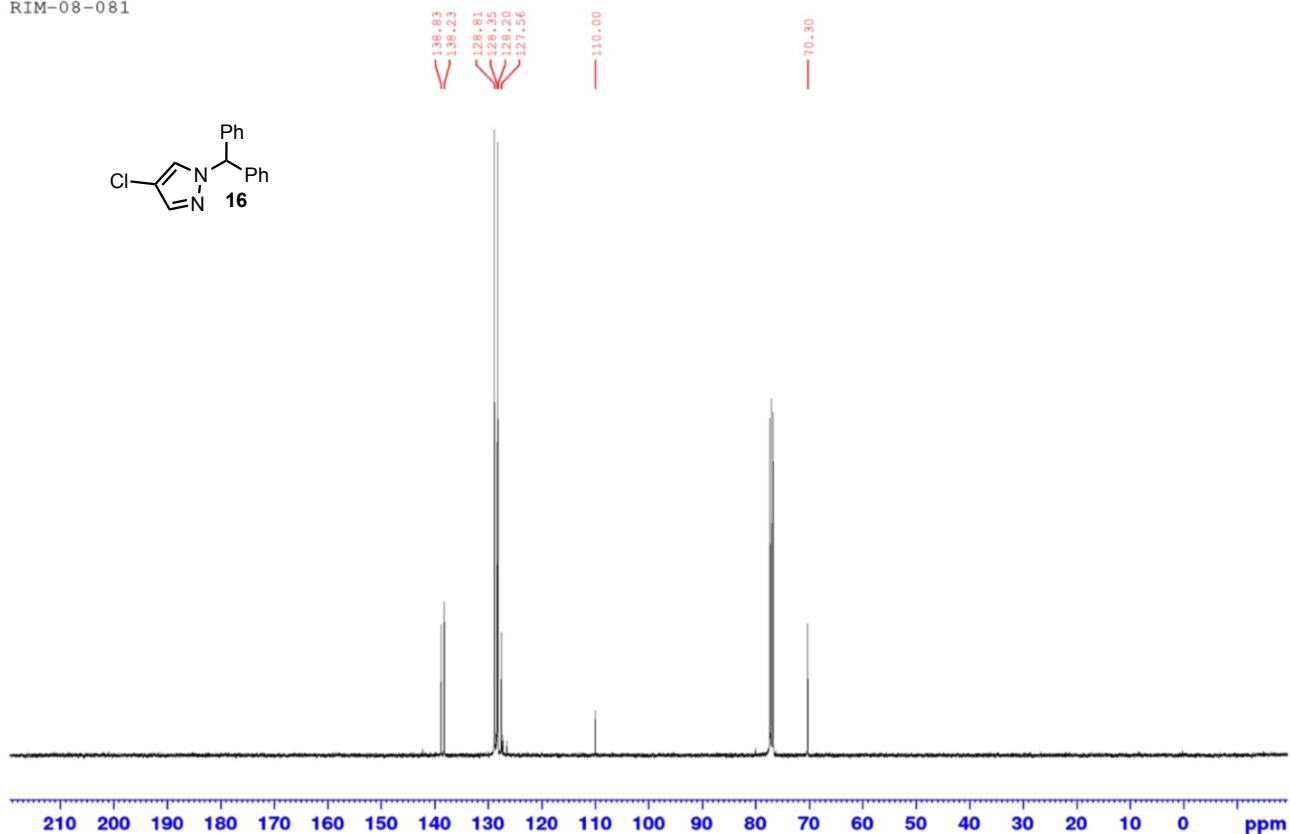

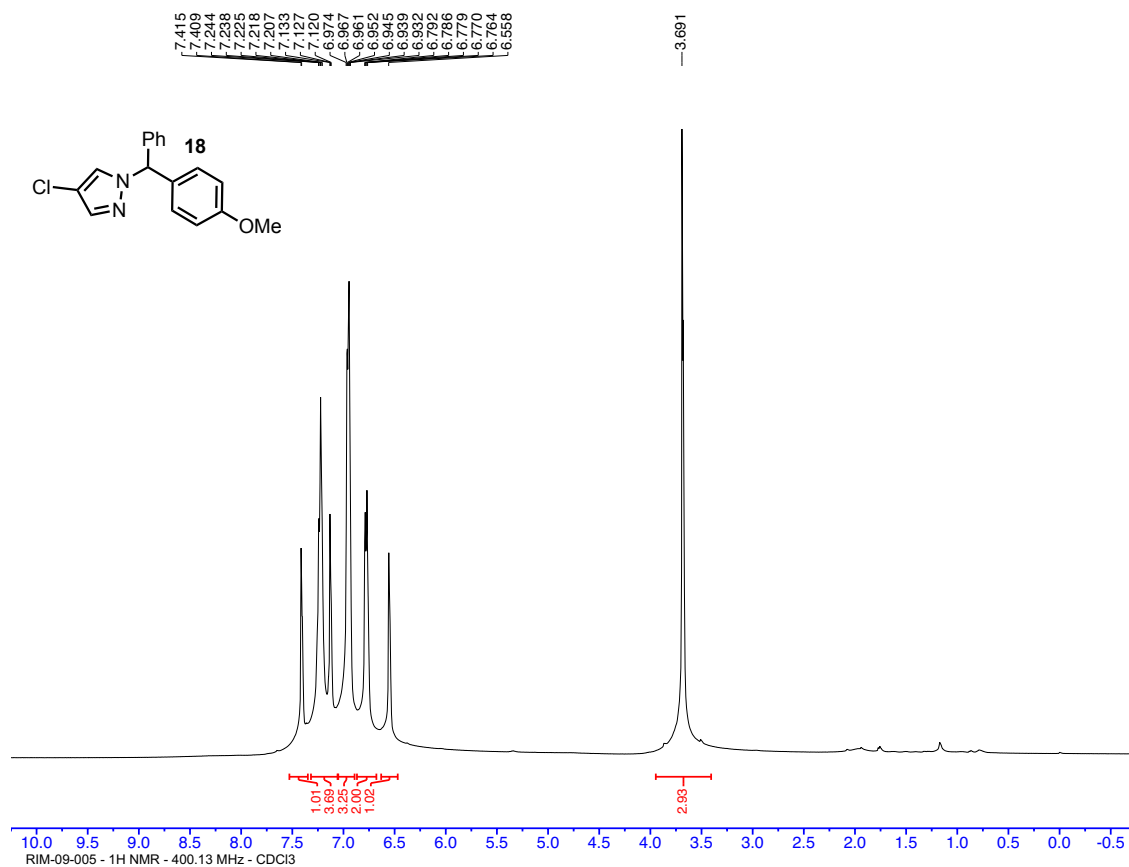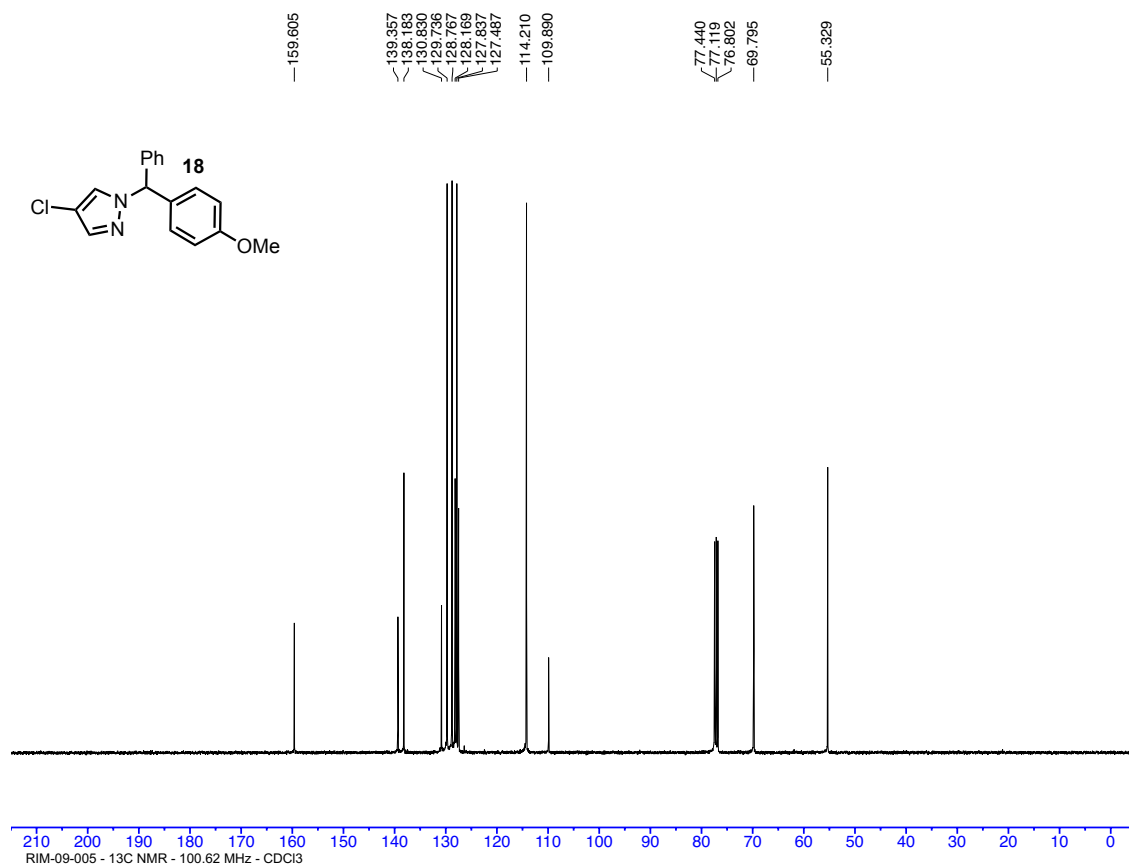

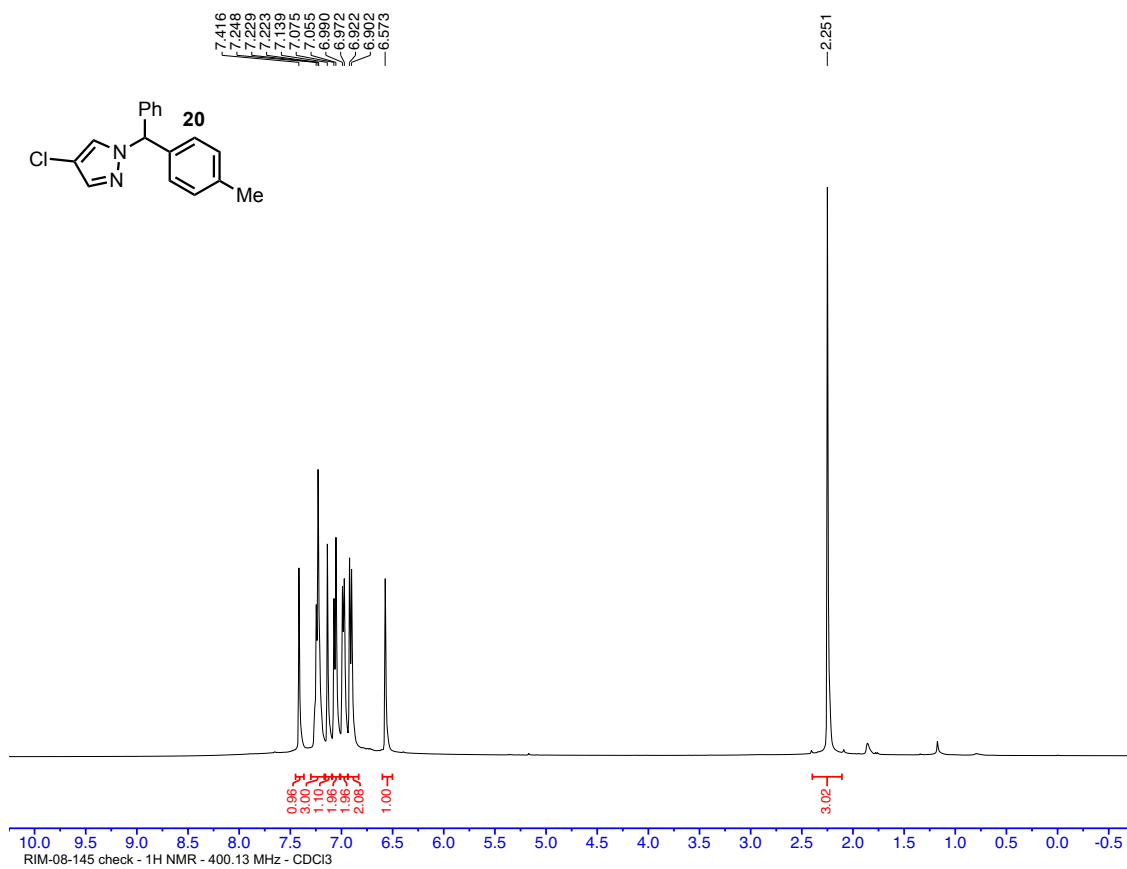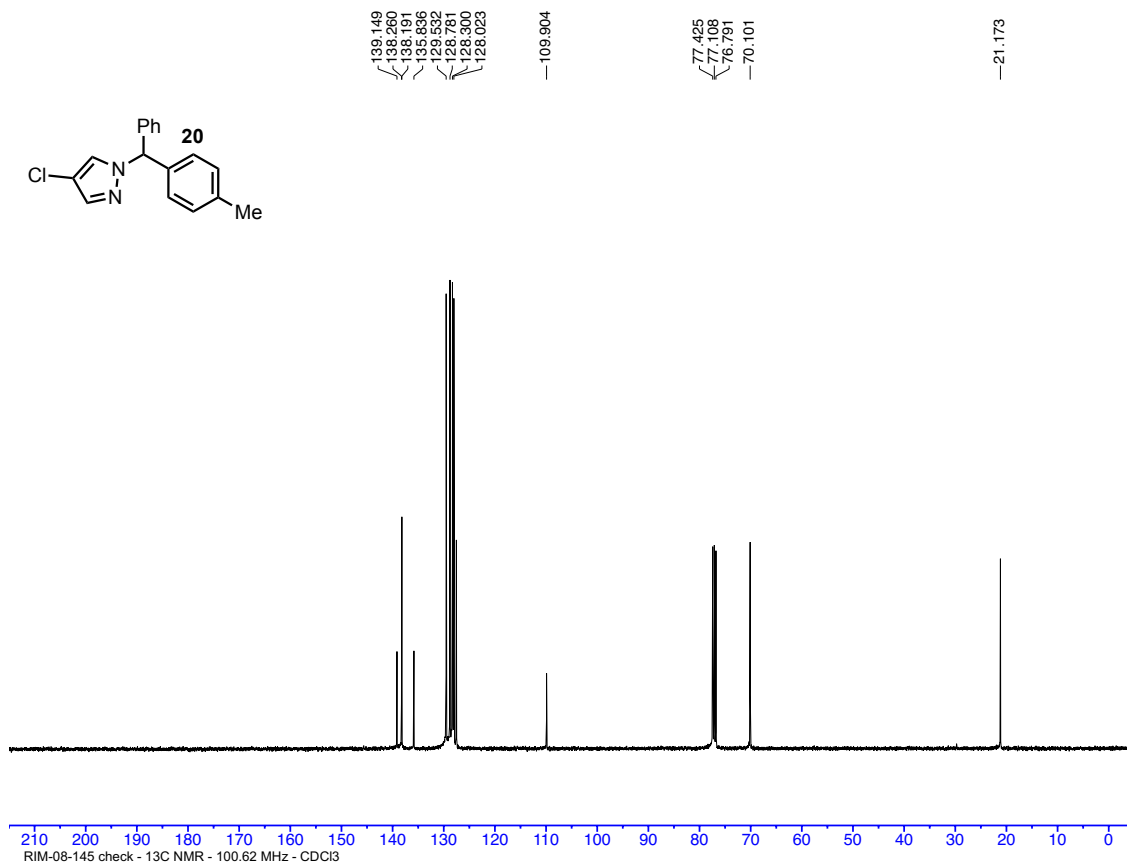

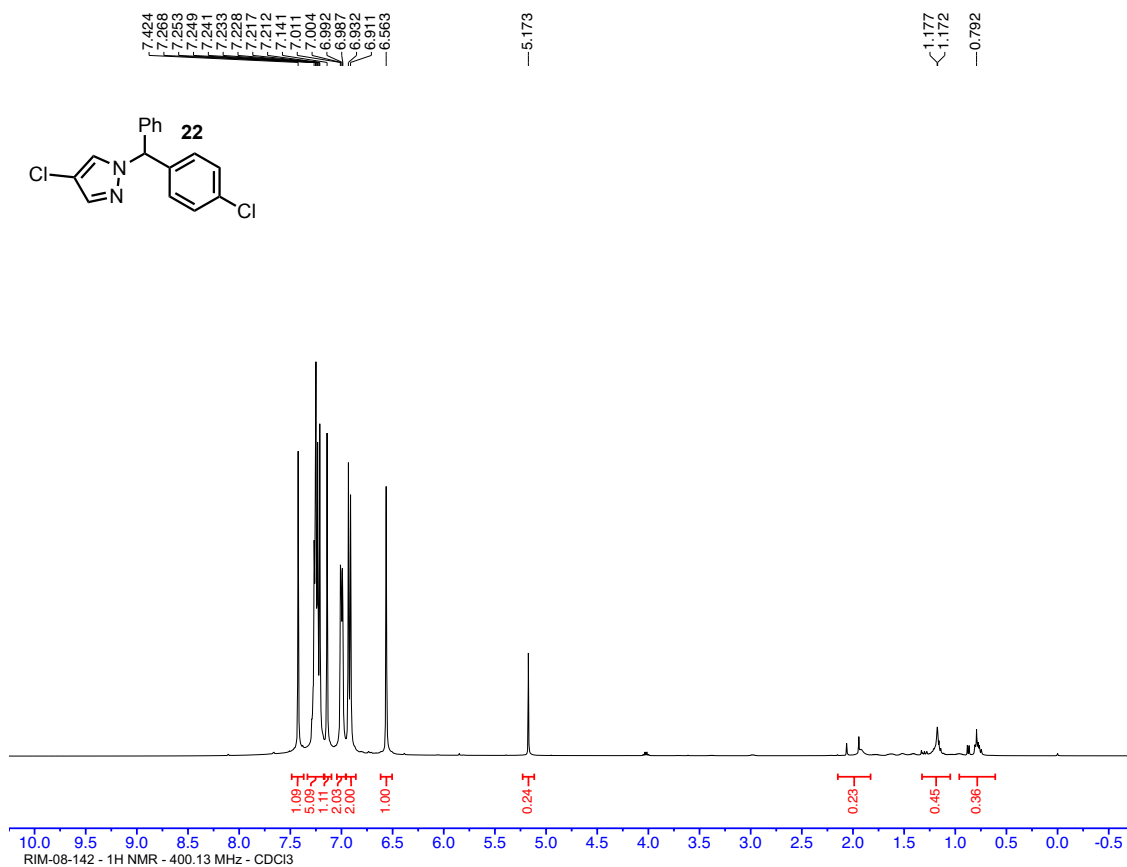

RIM-08-142

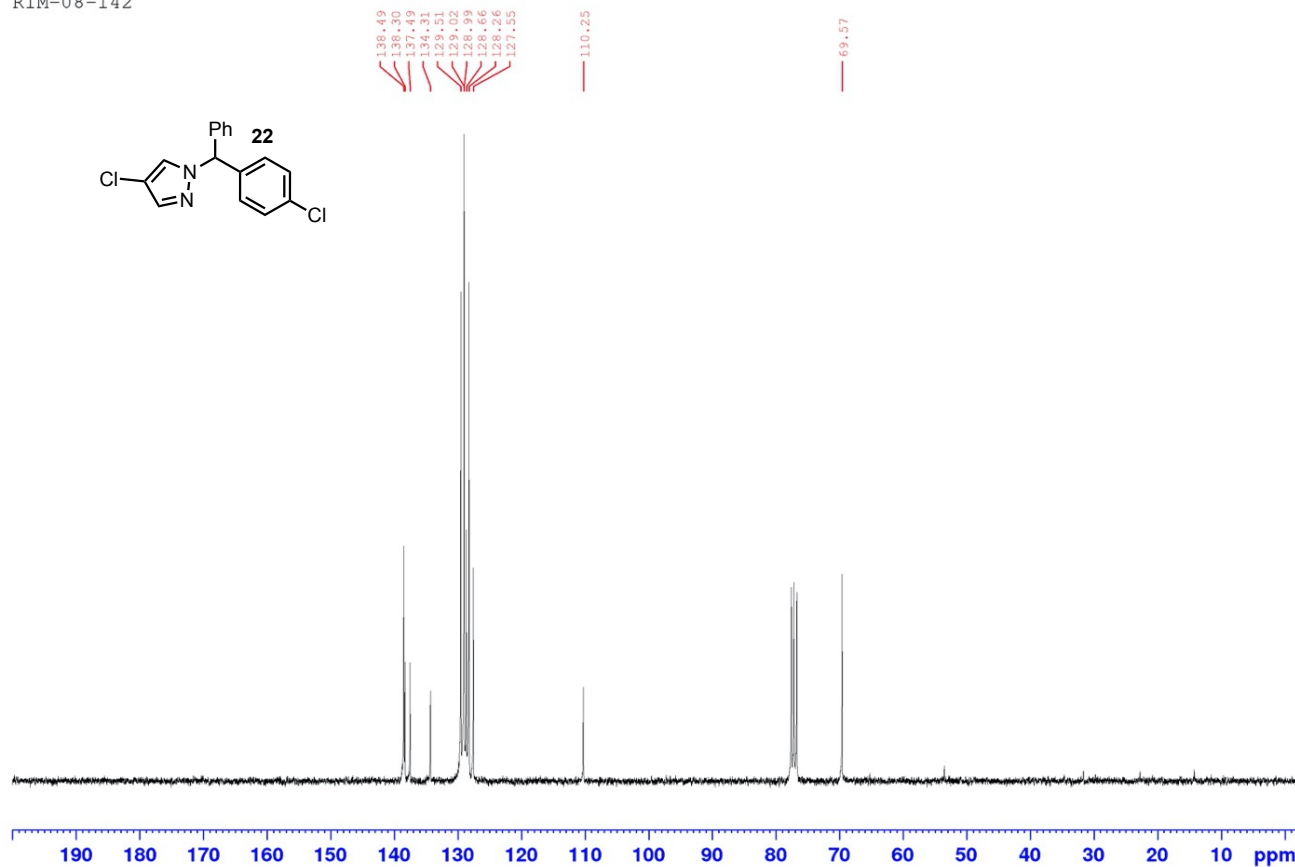

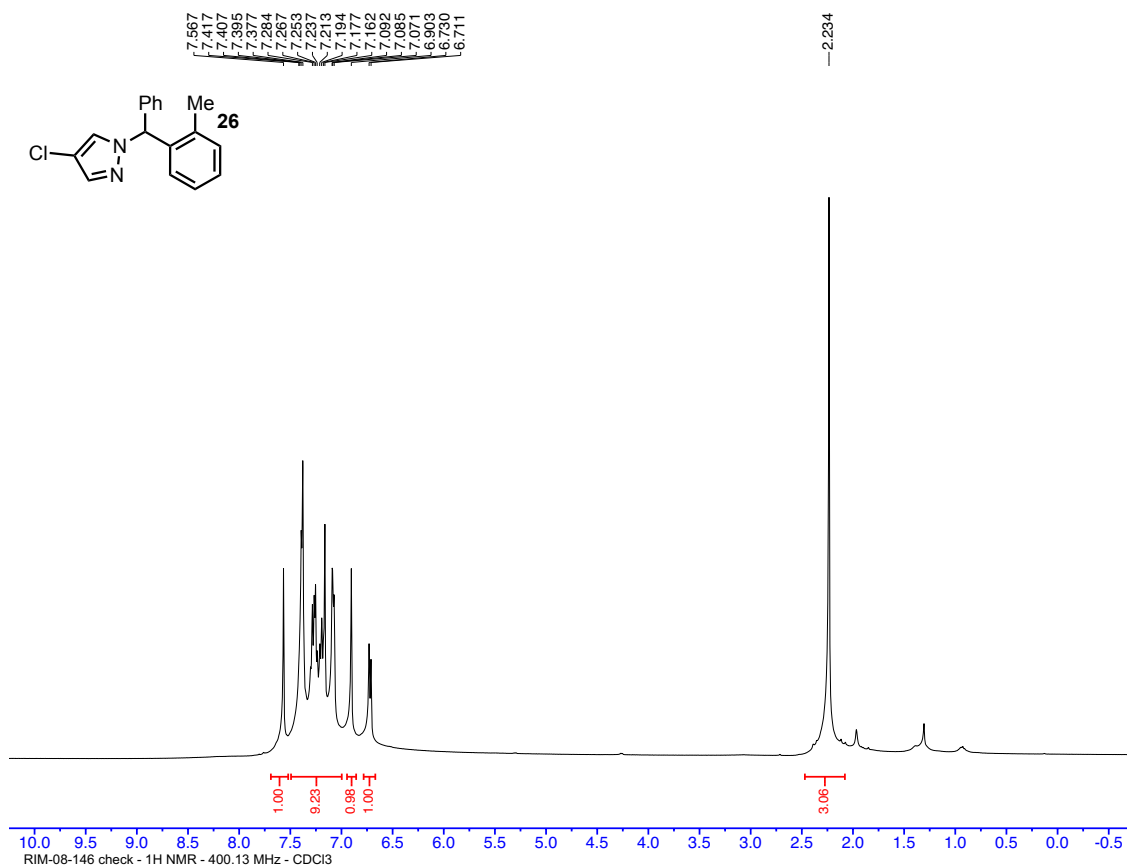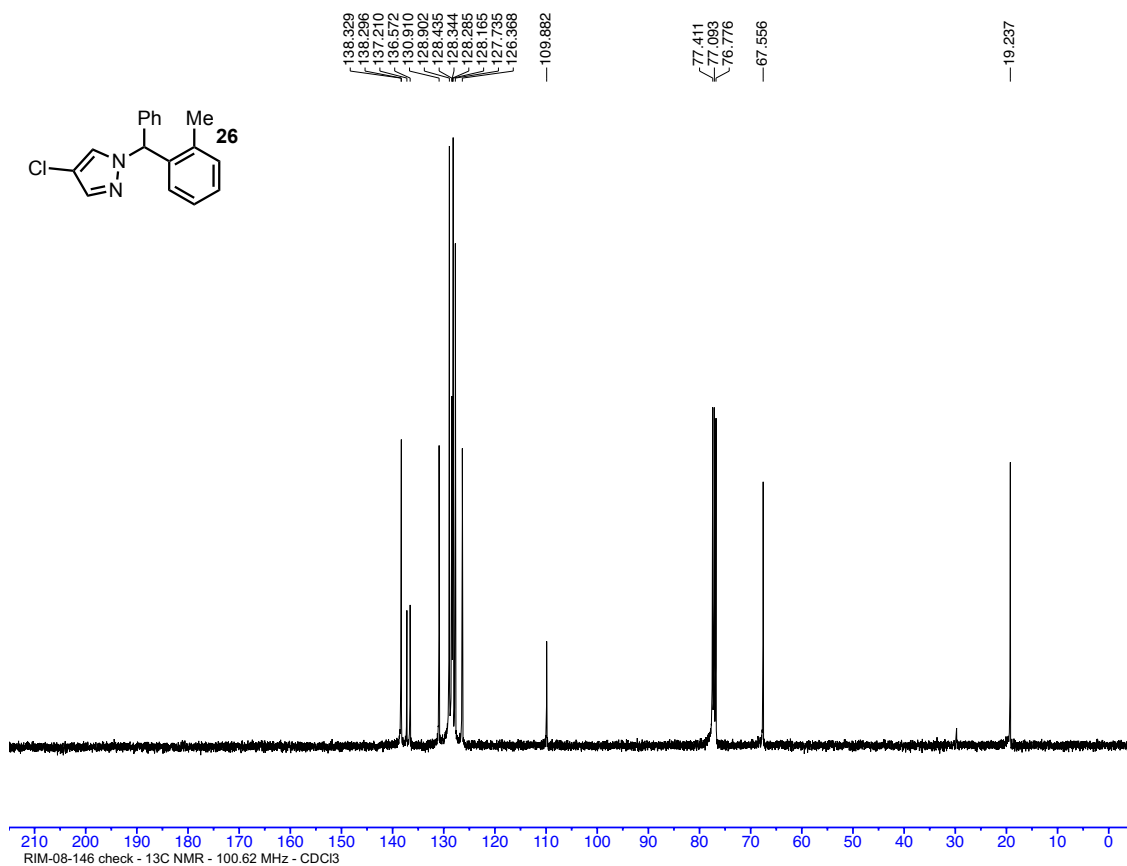

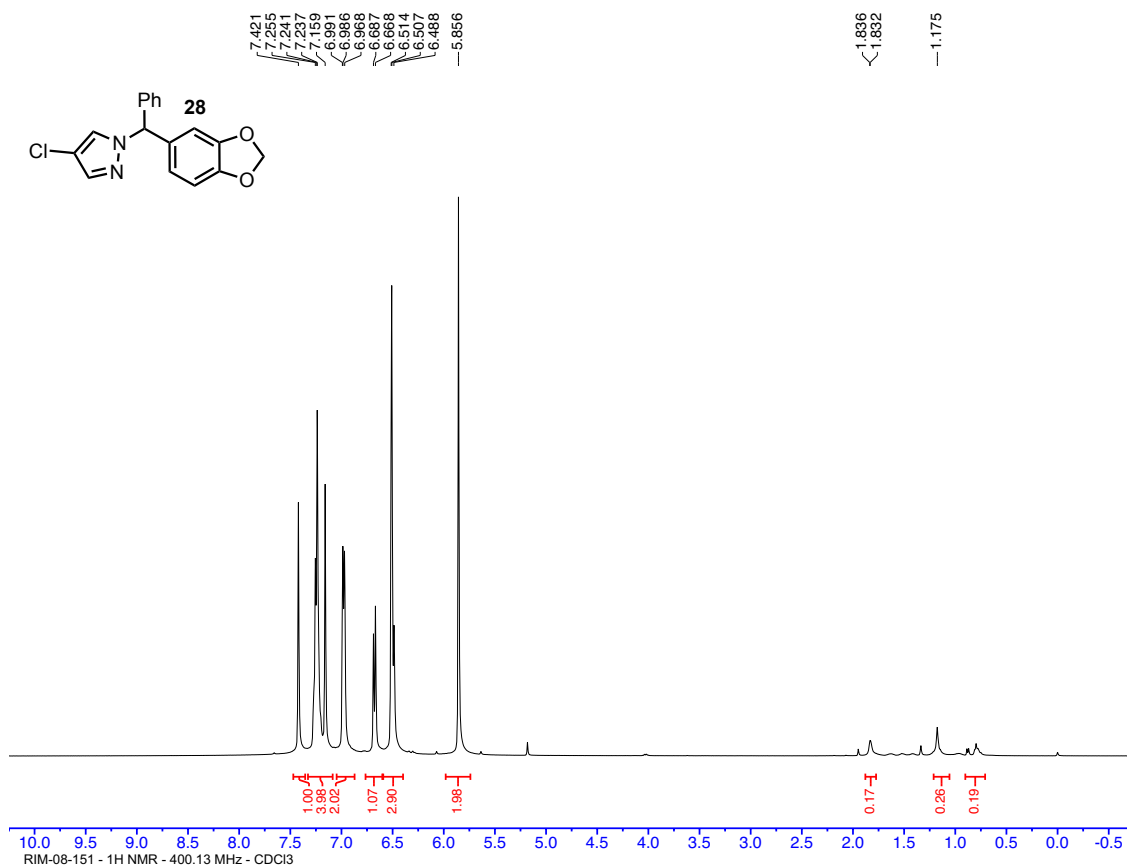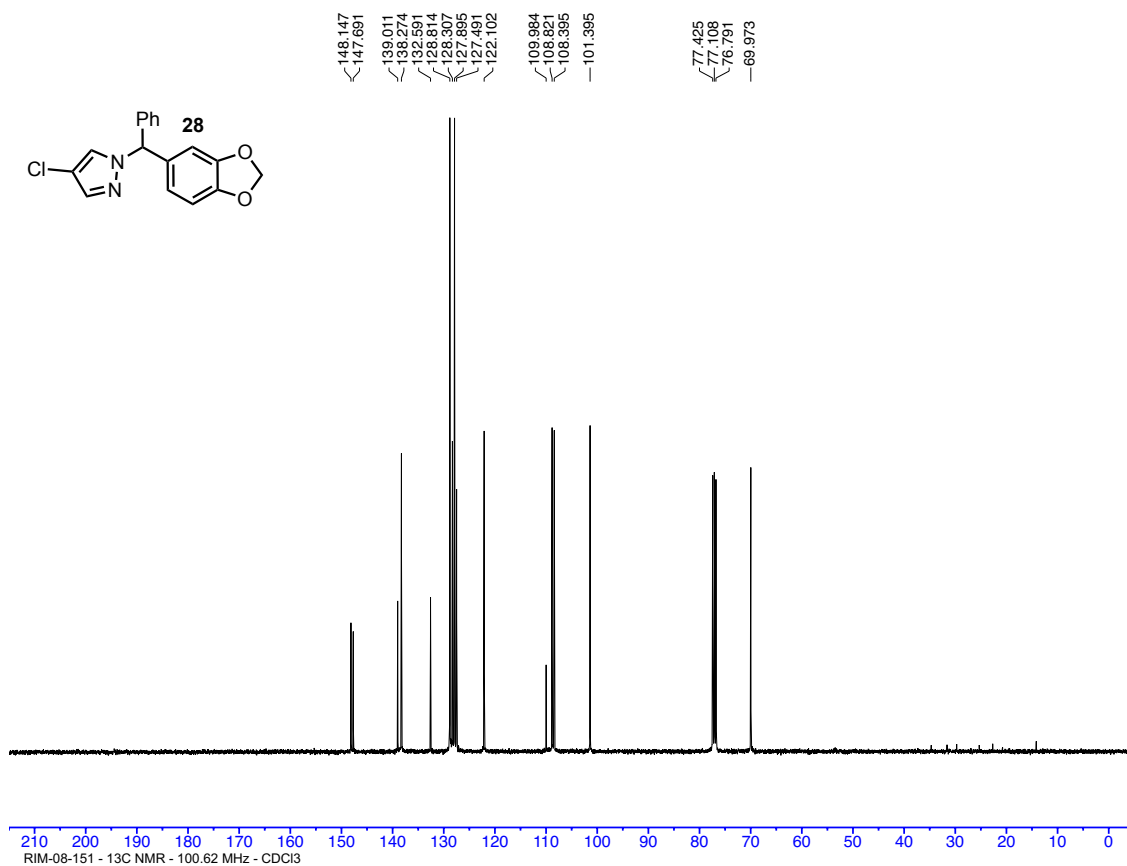

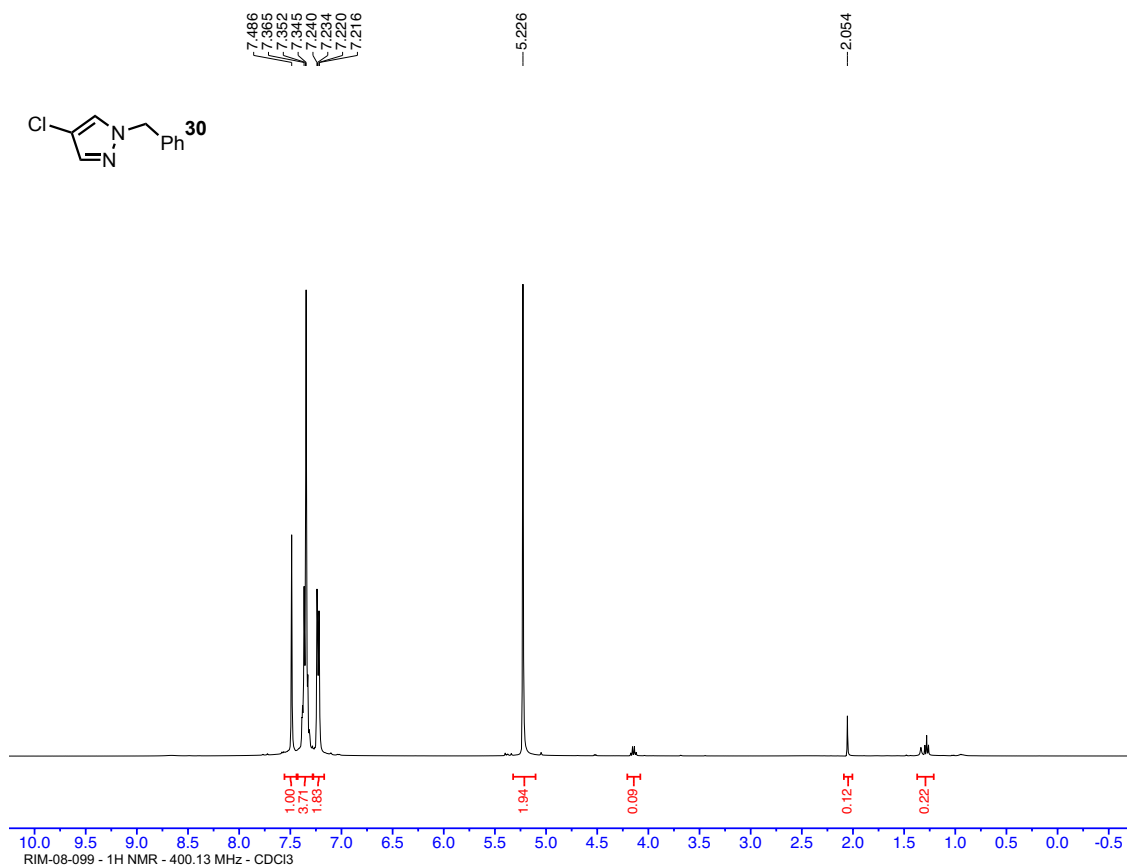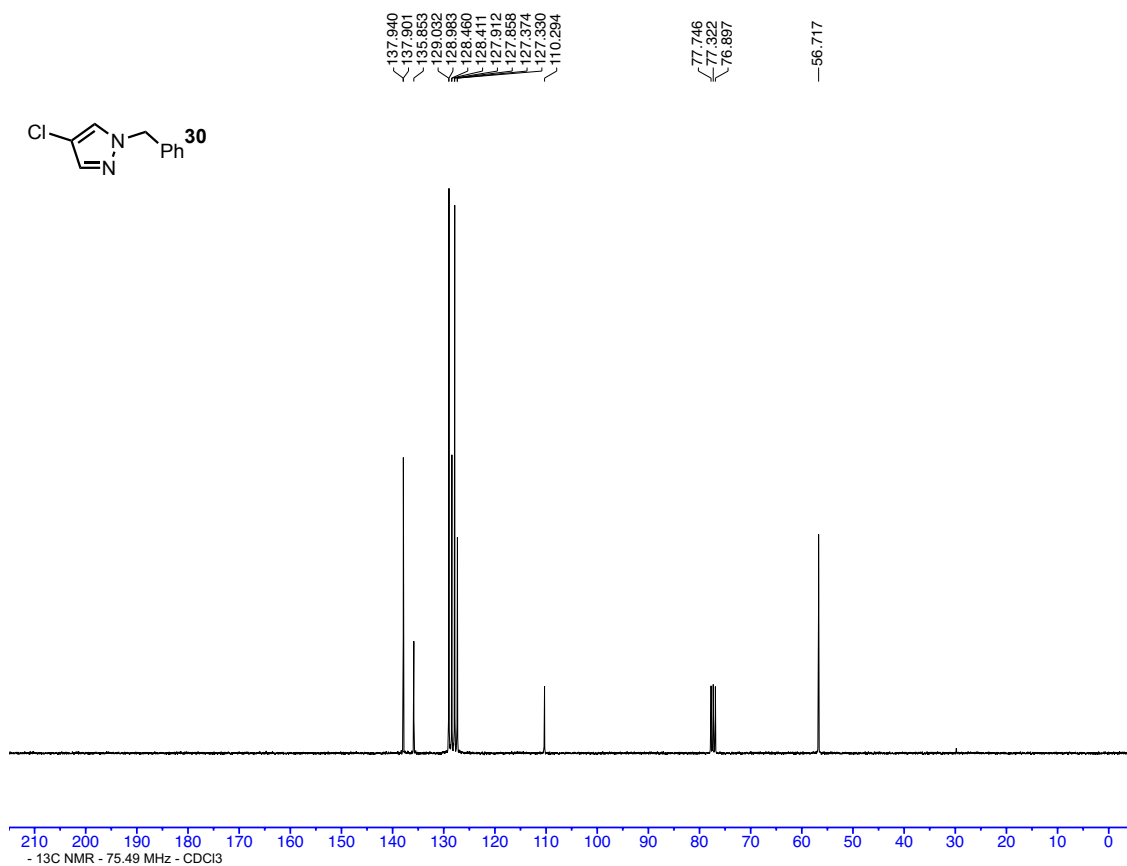

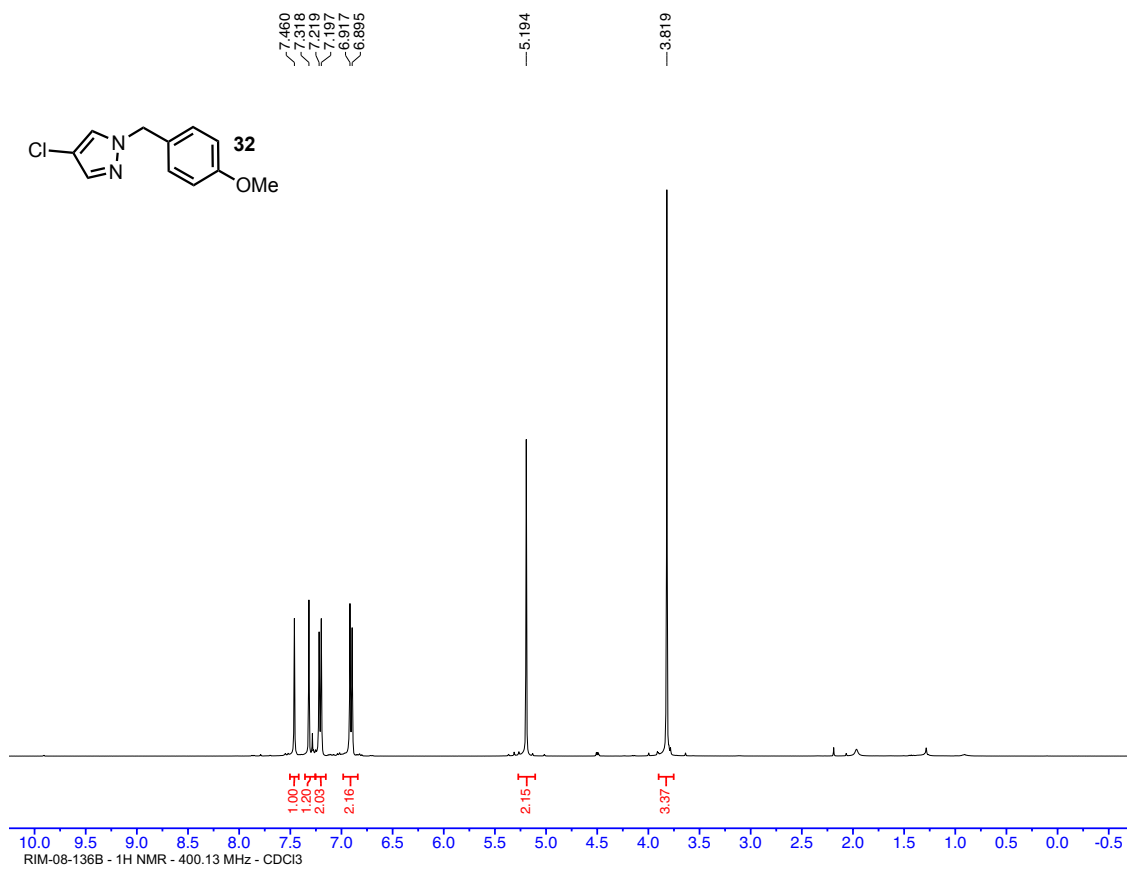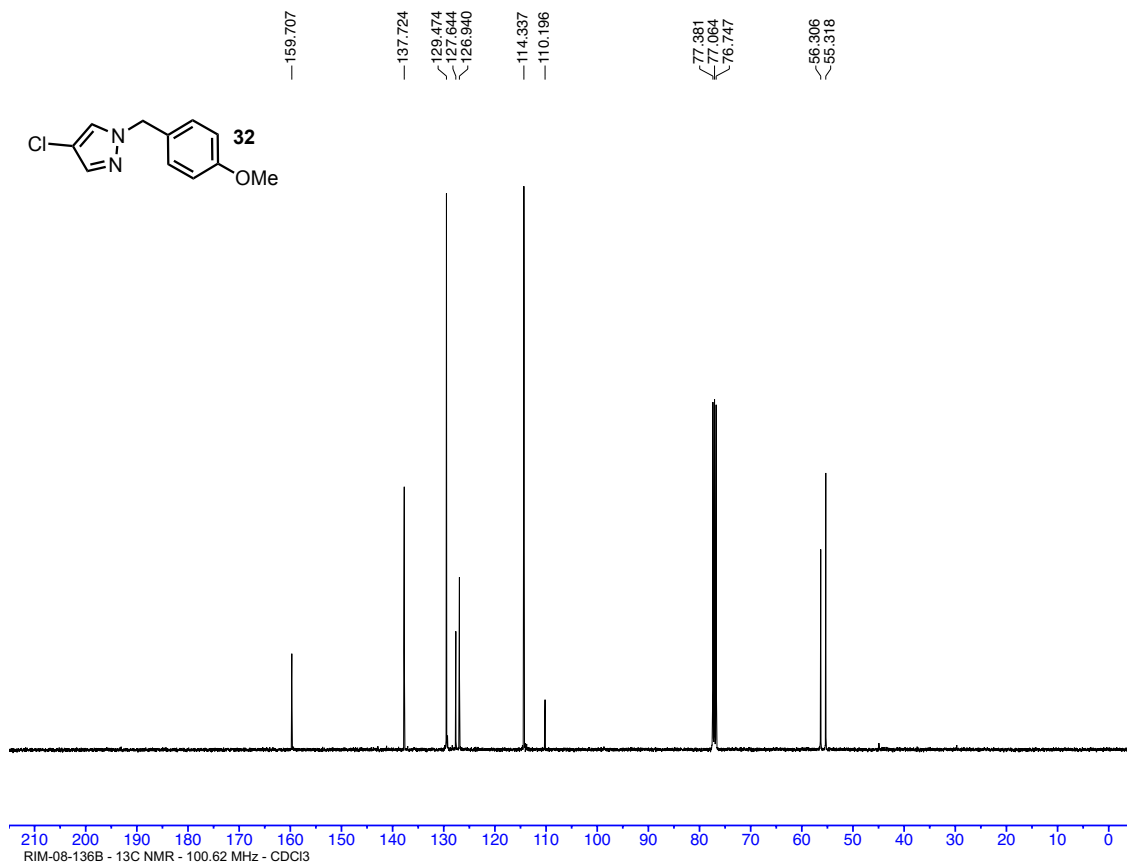

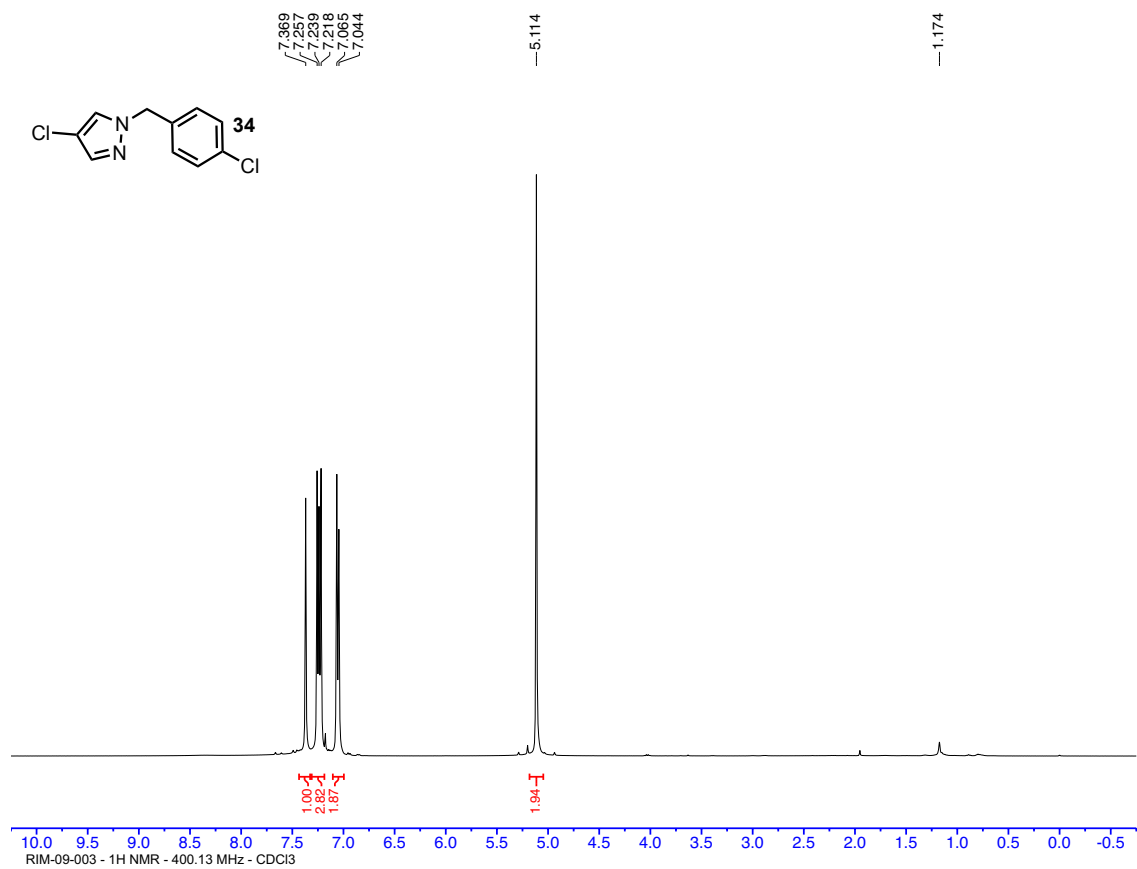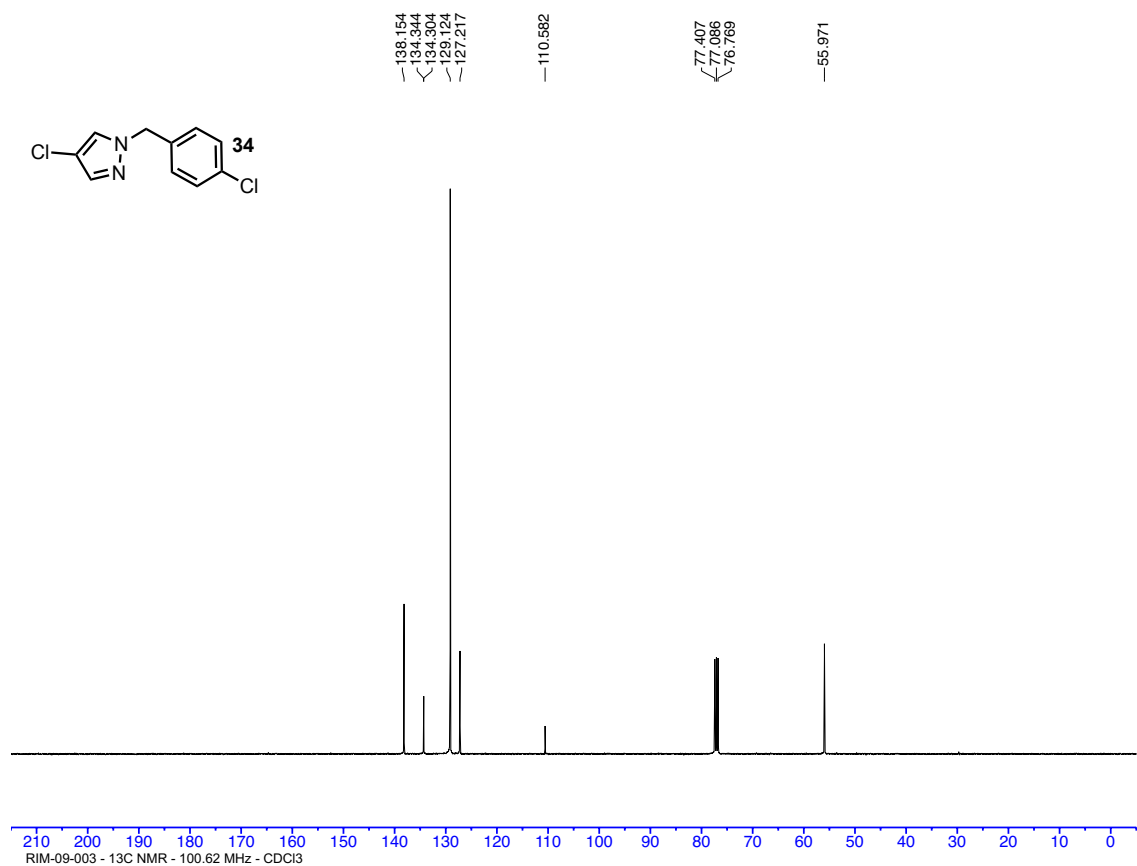

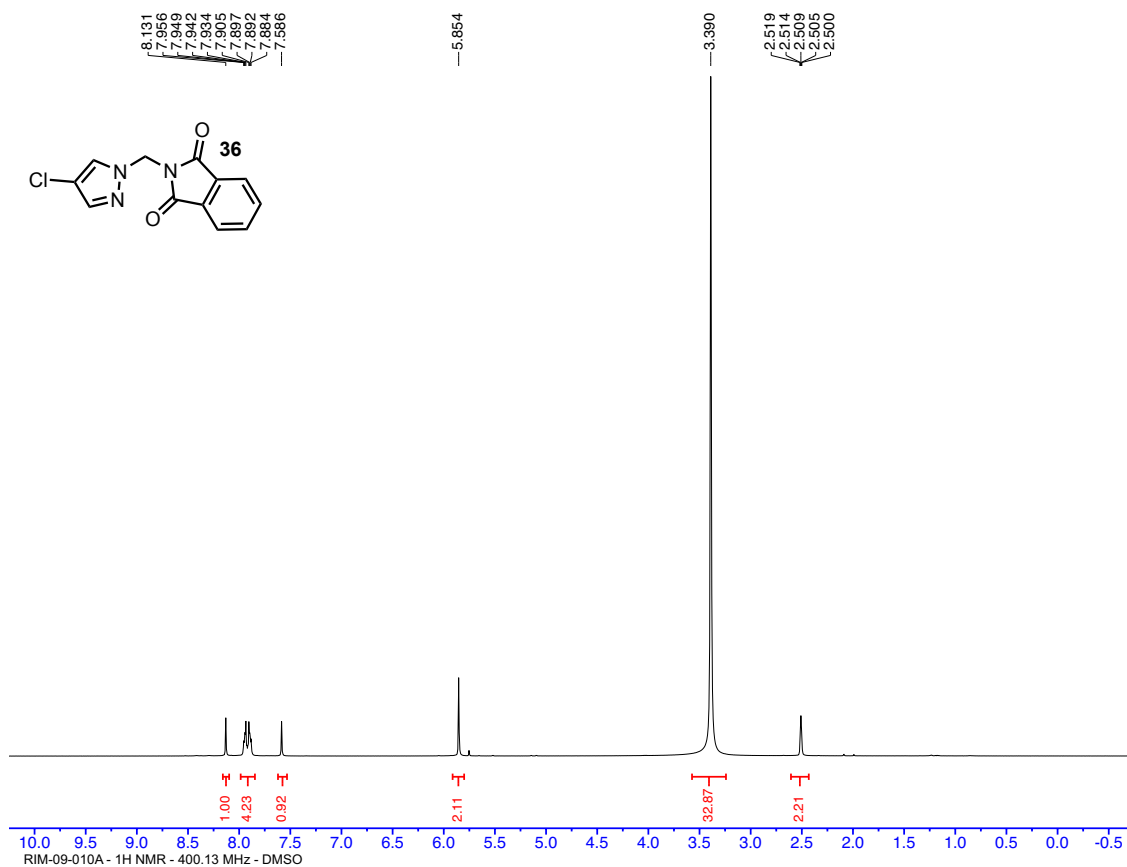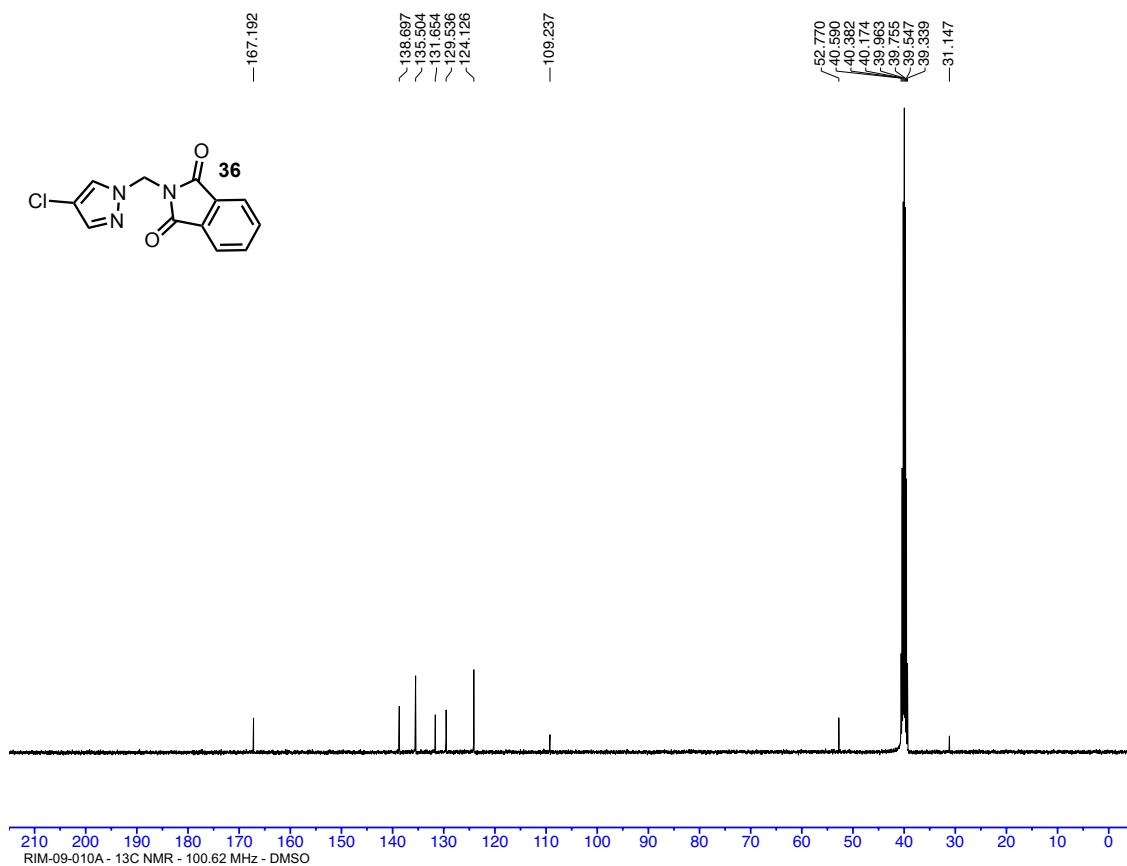

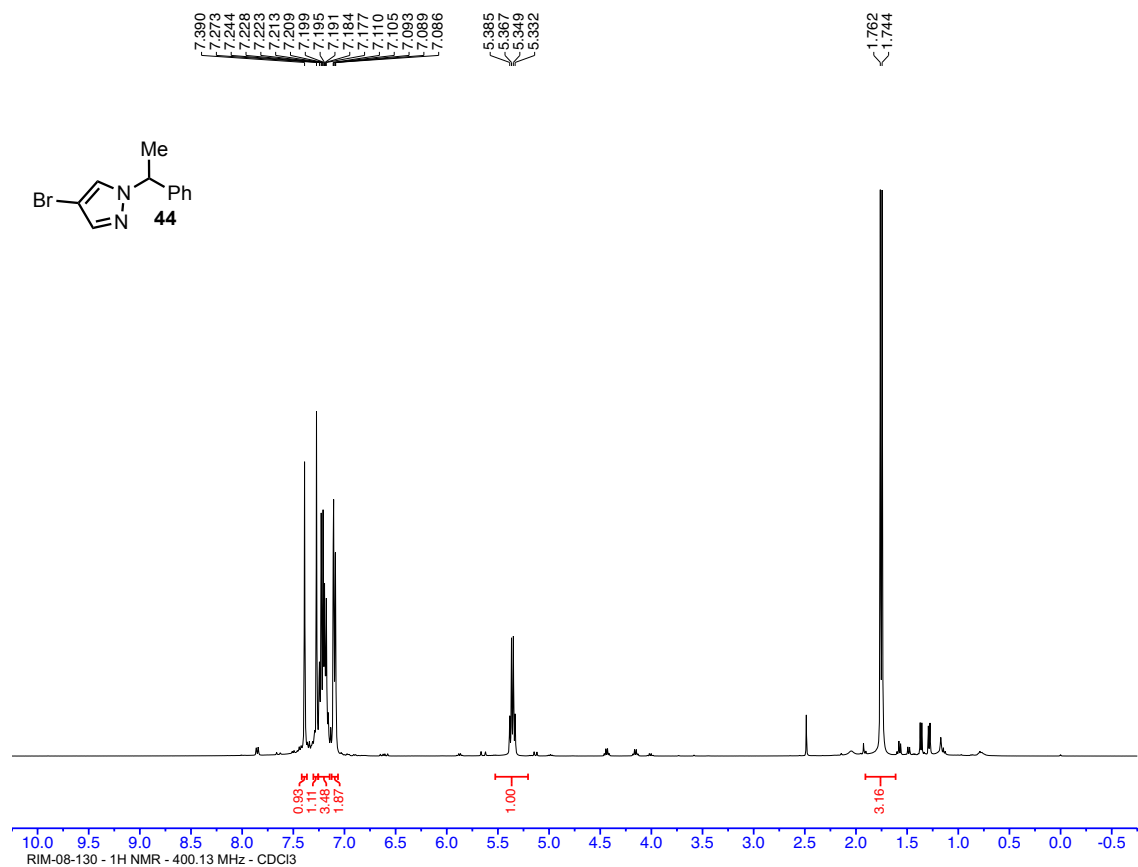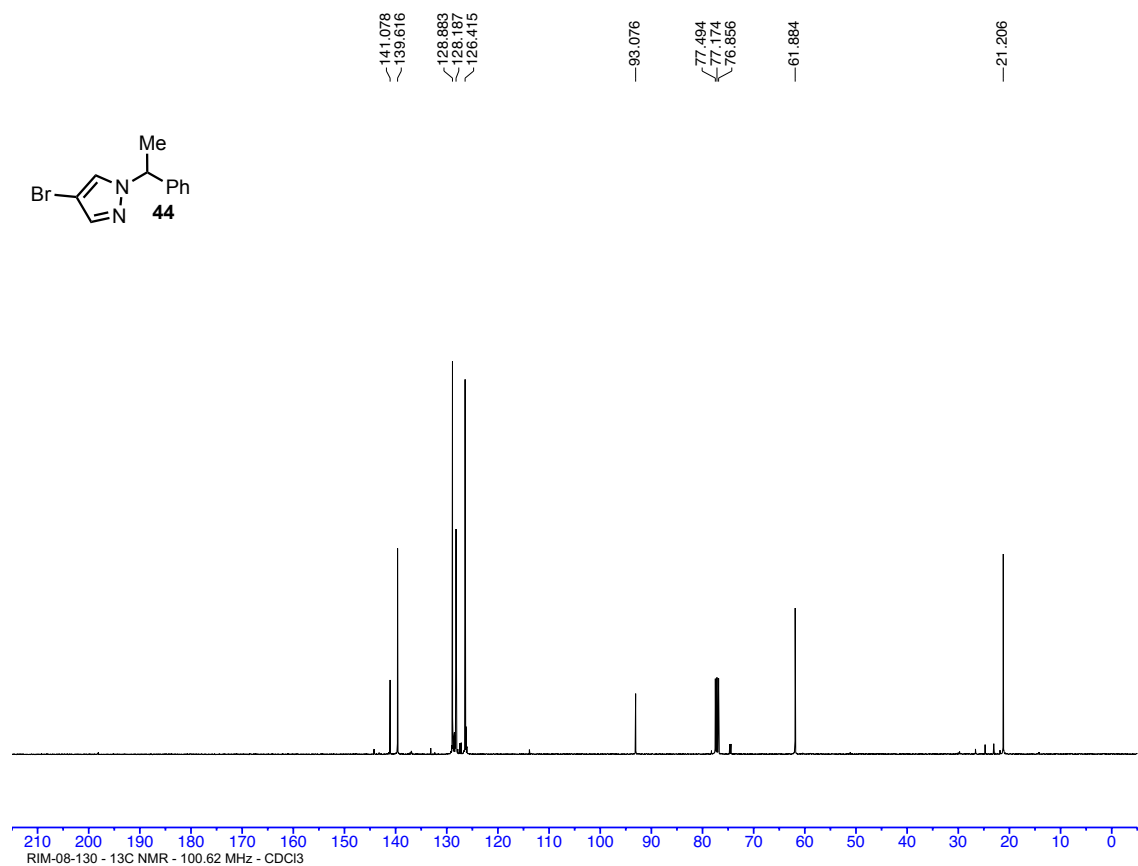

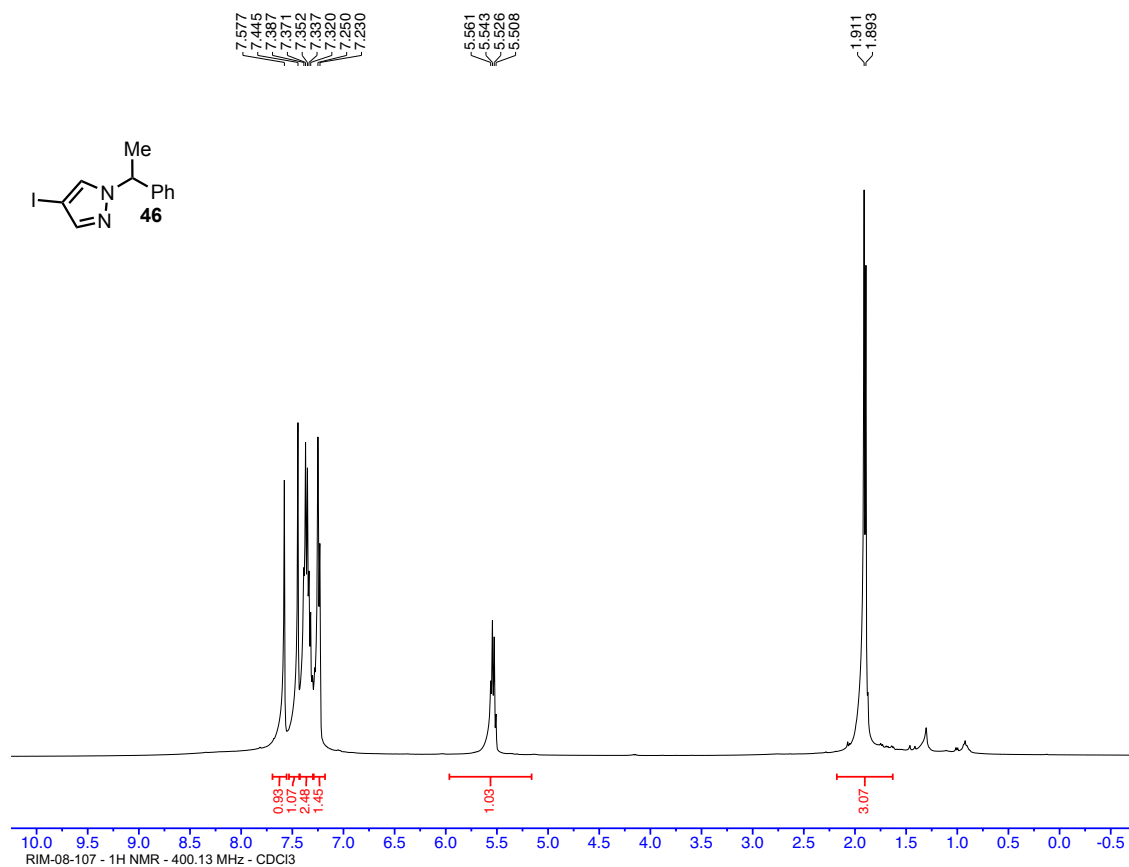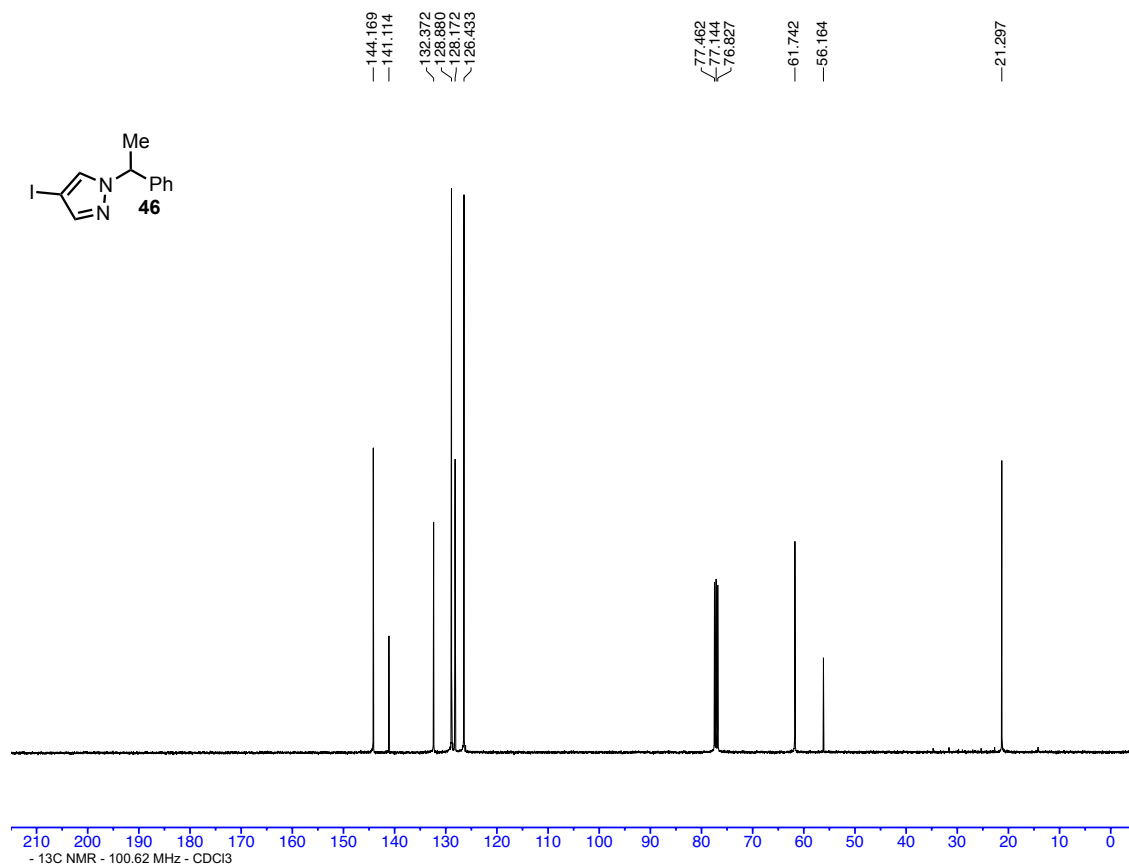

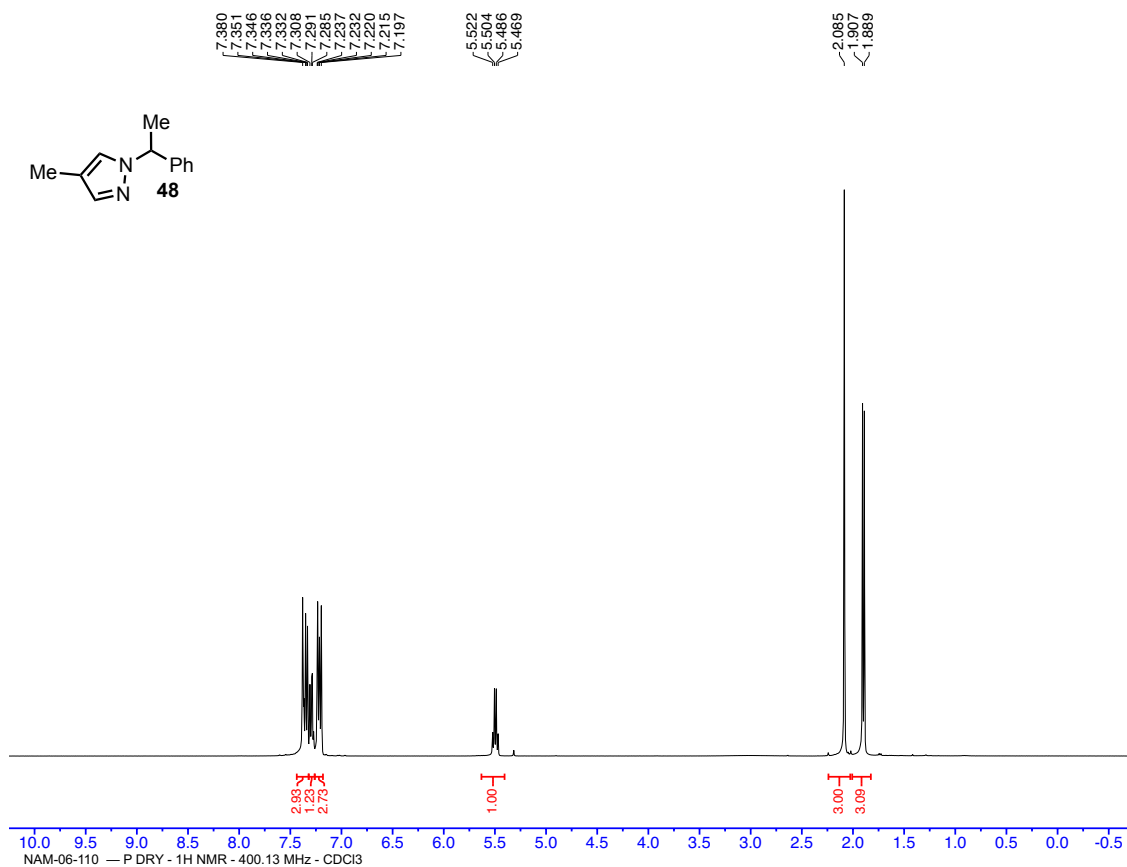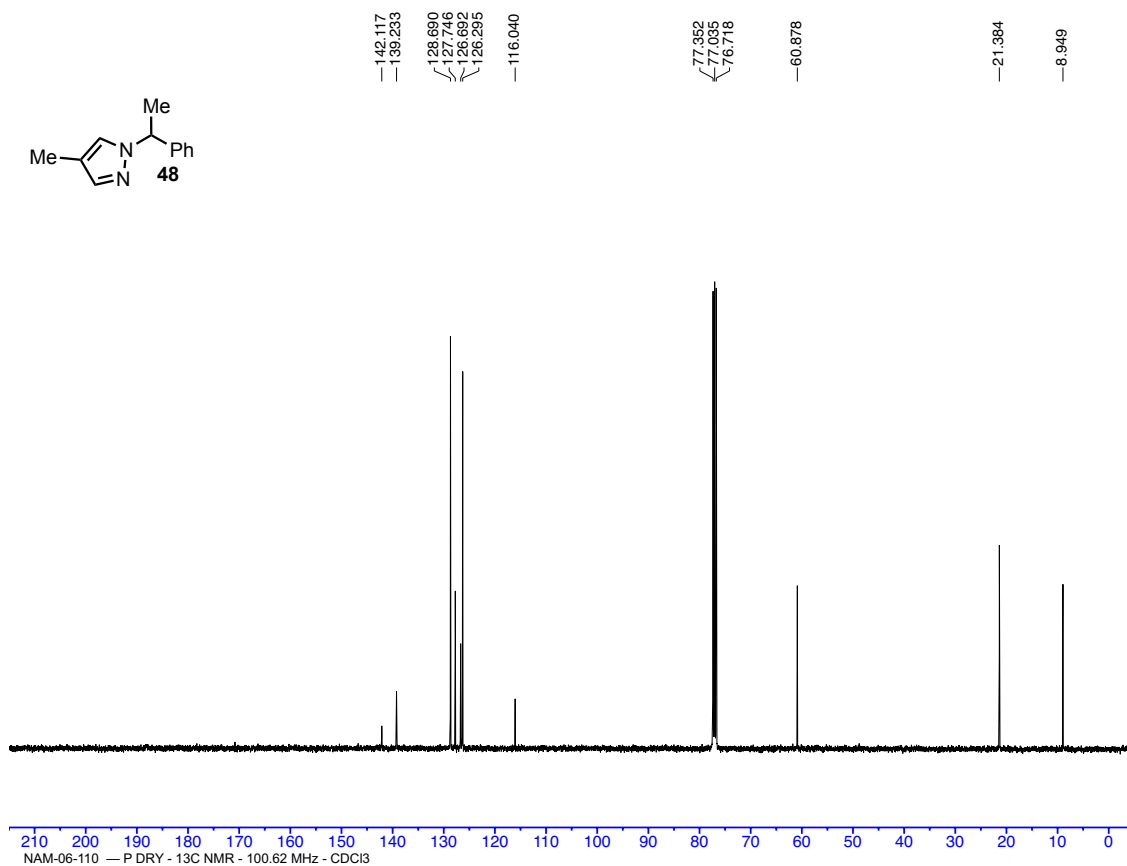

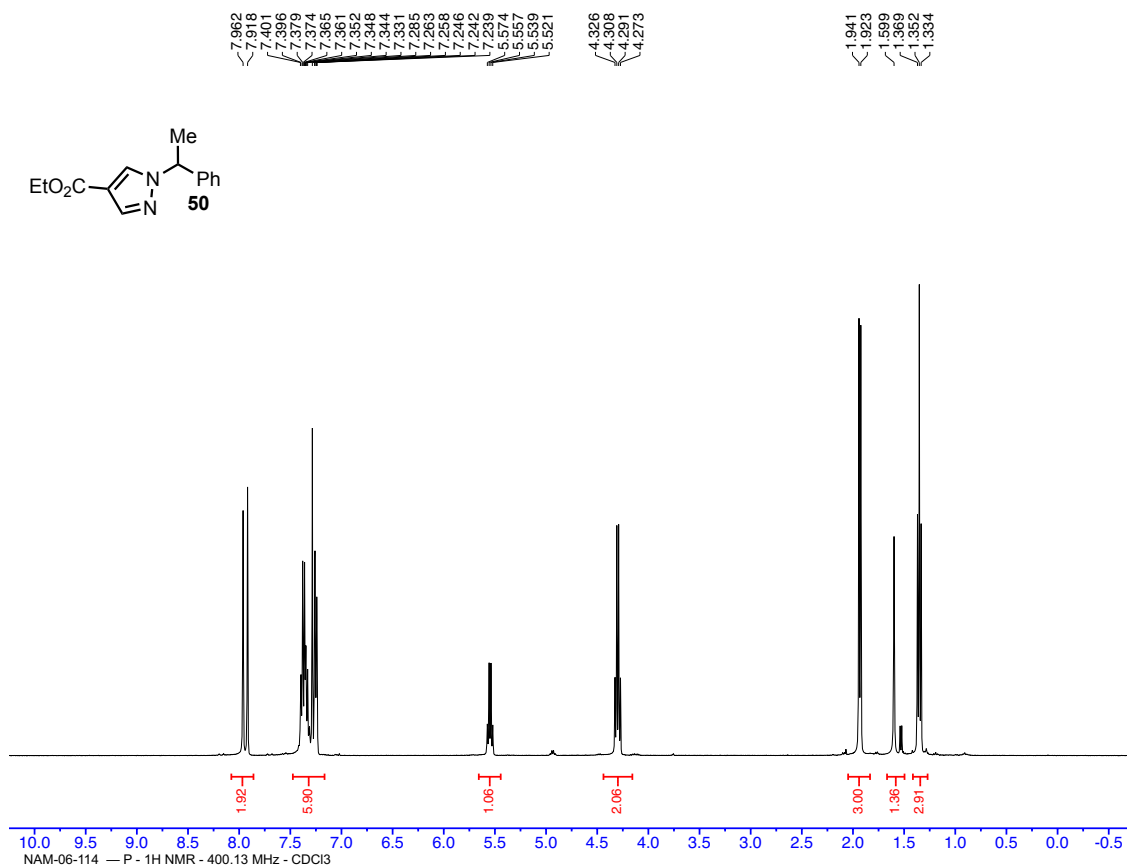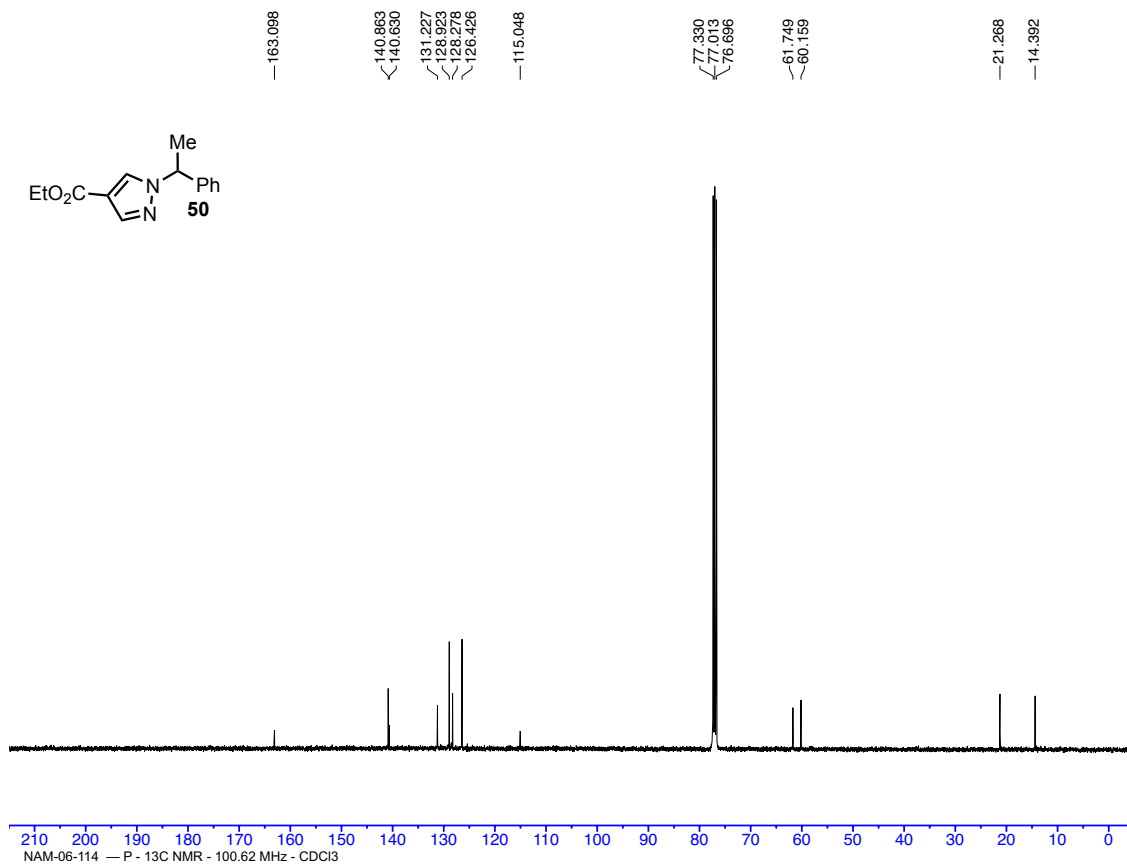

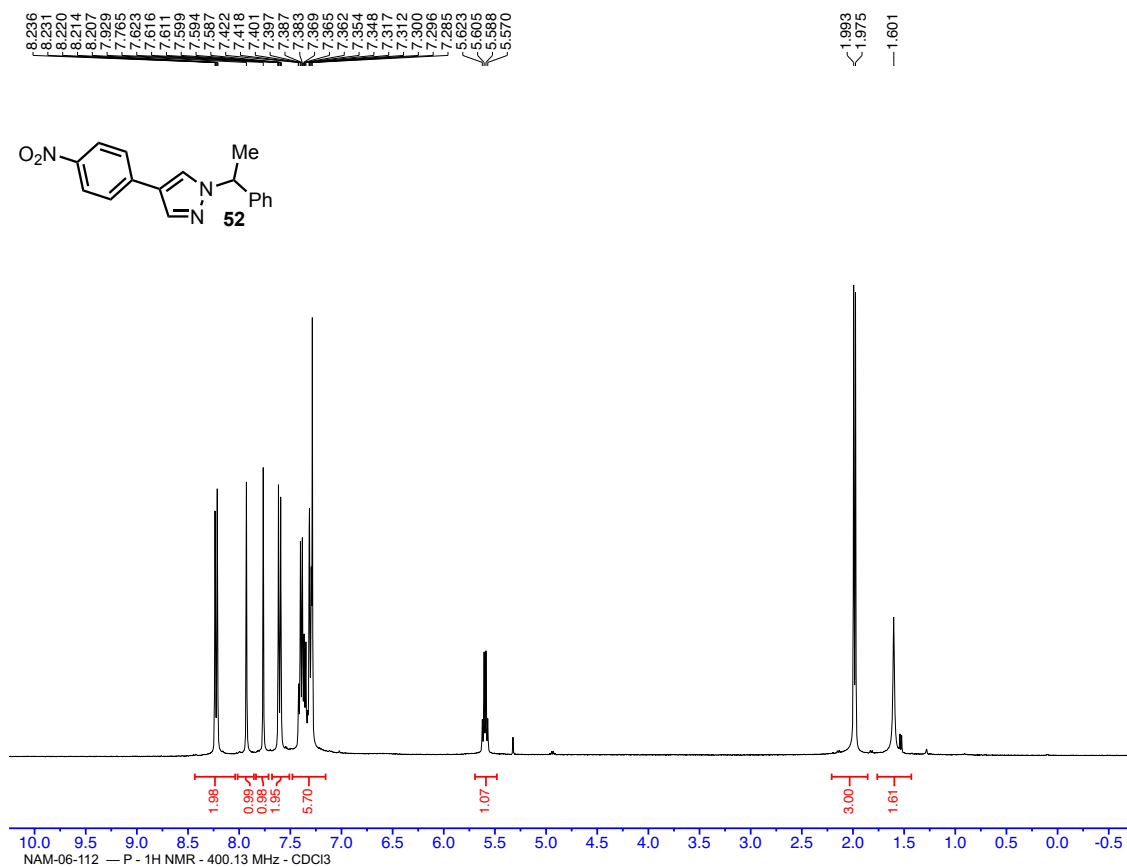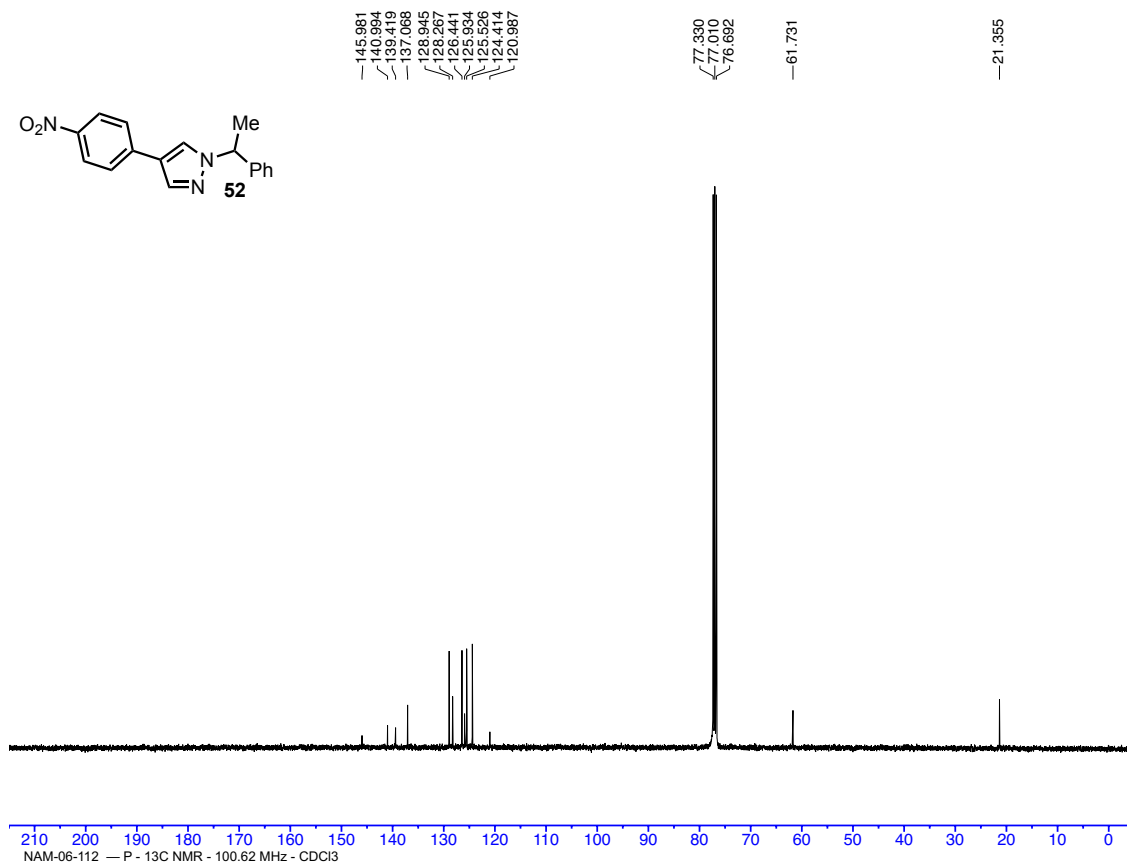

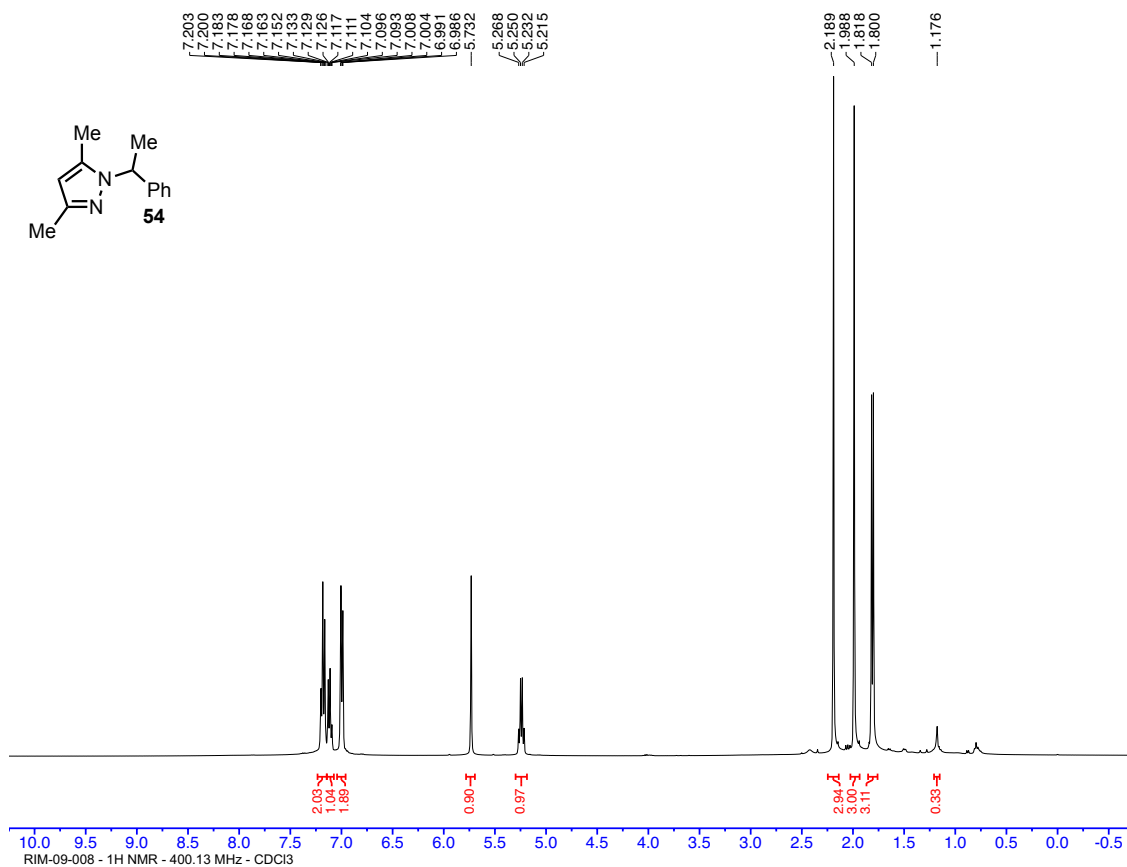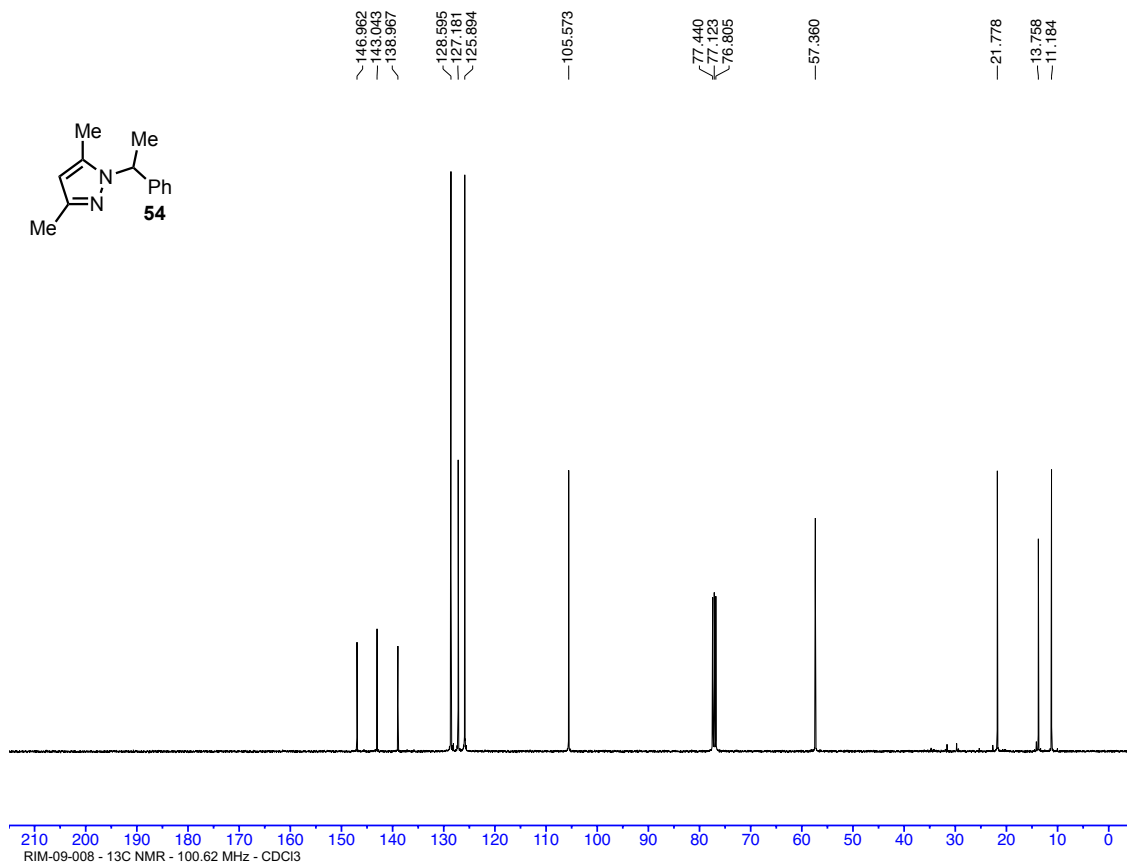

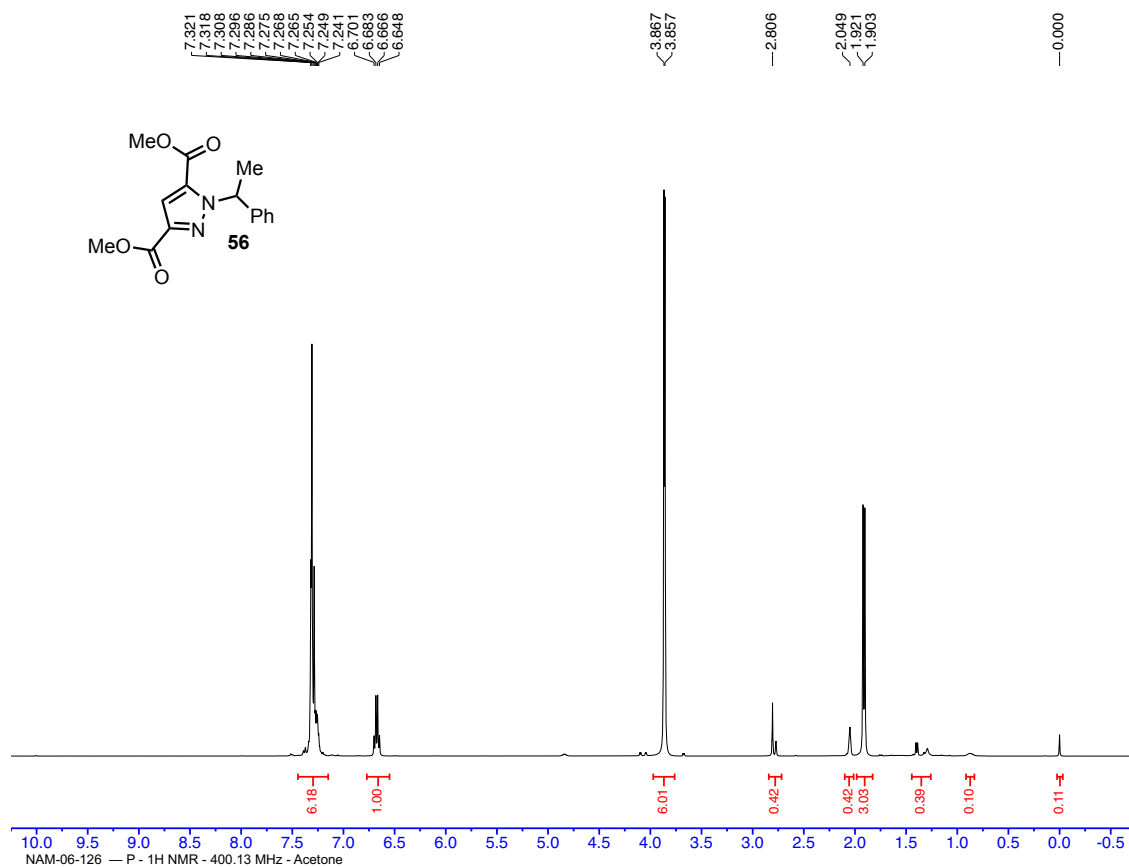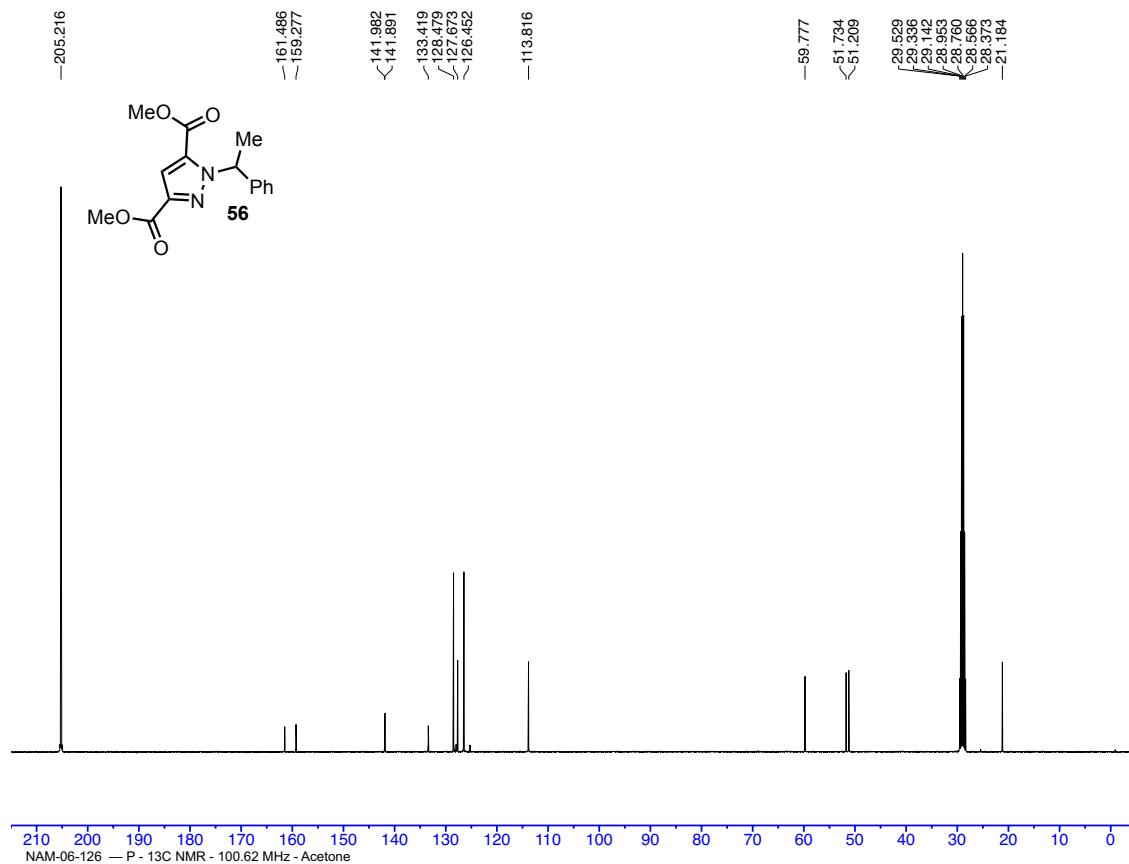

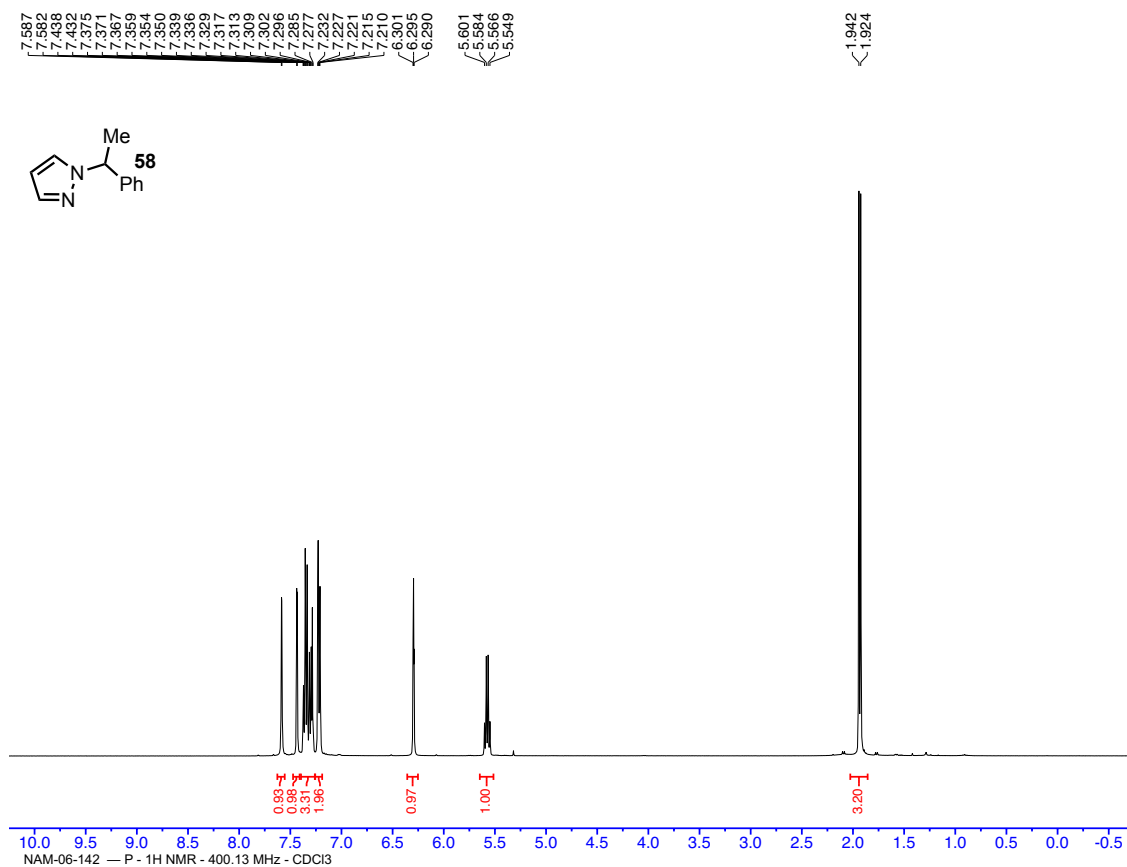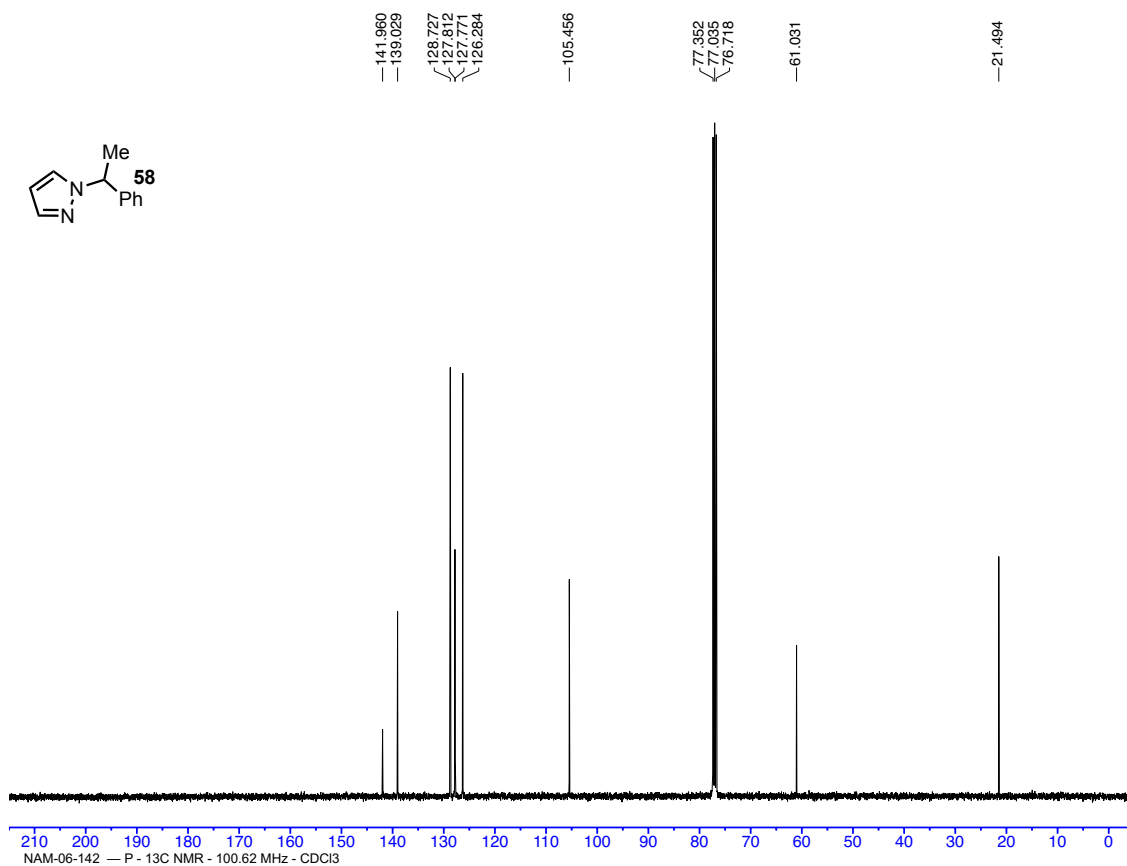

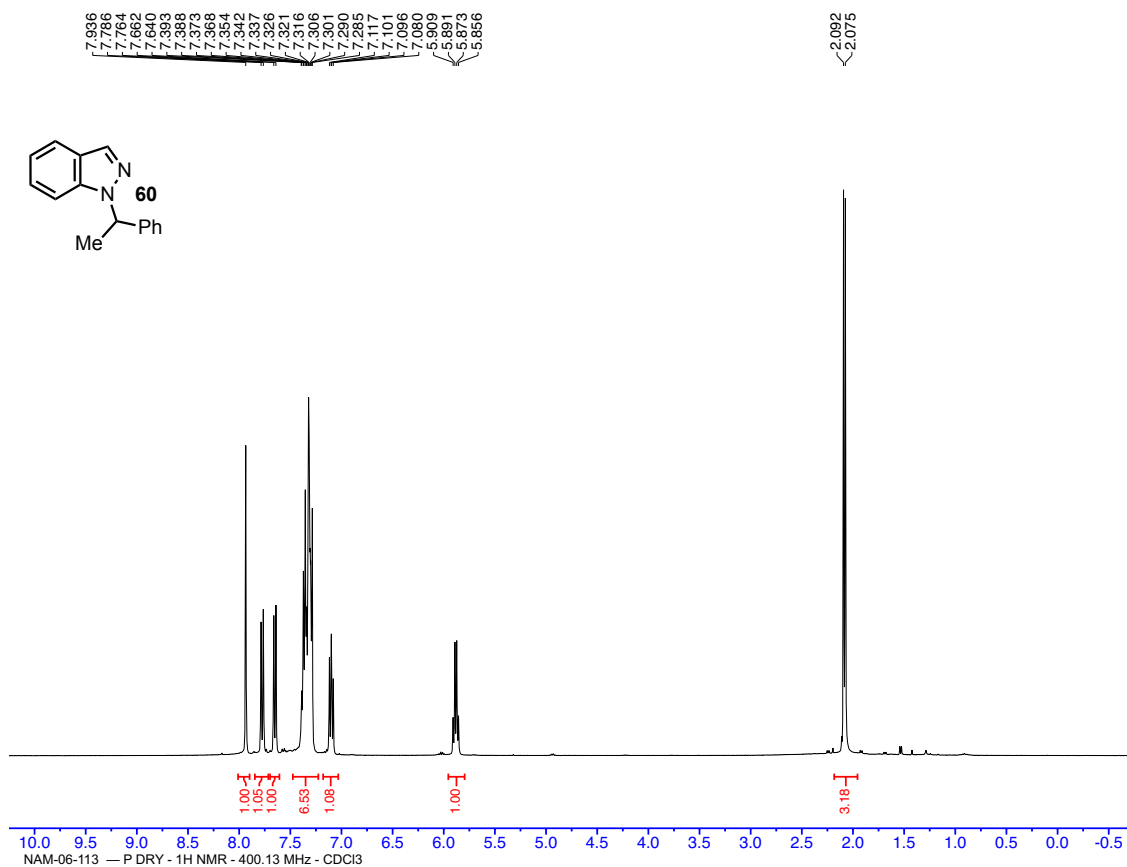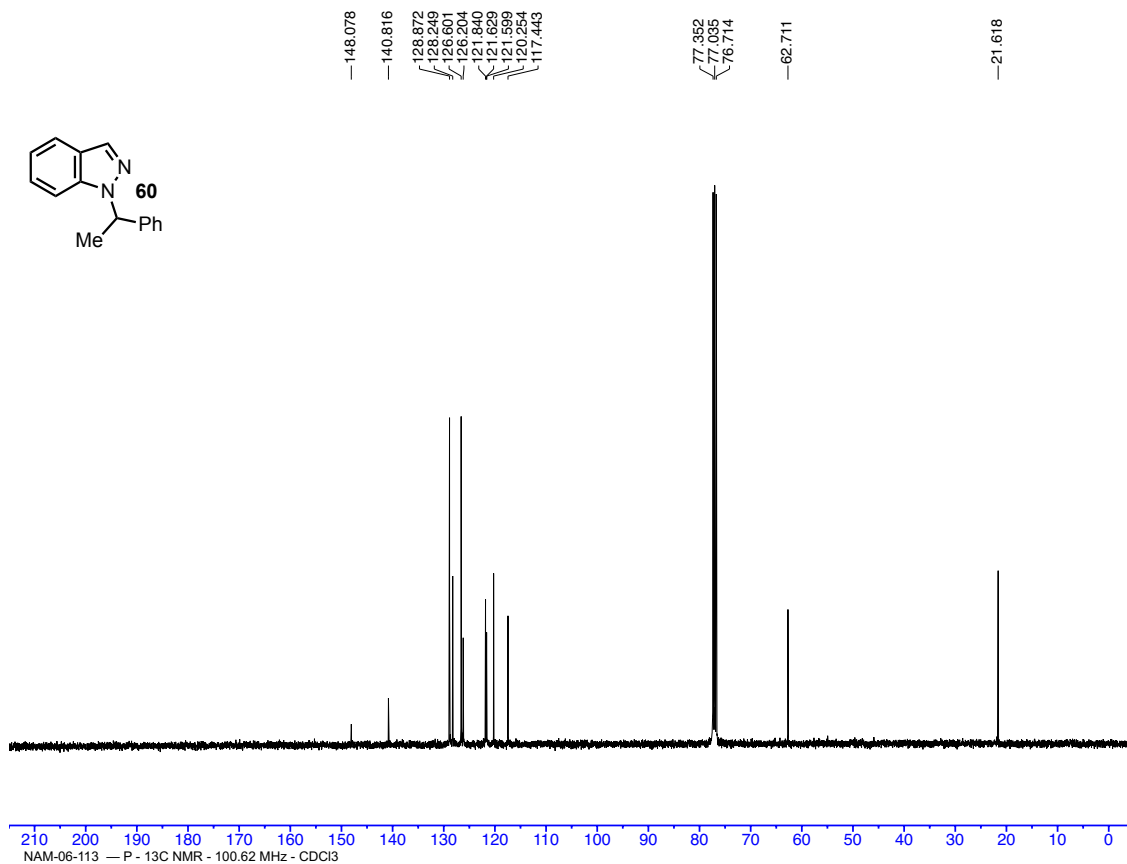

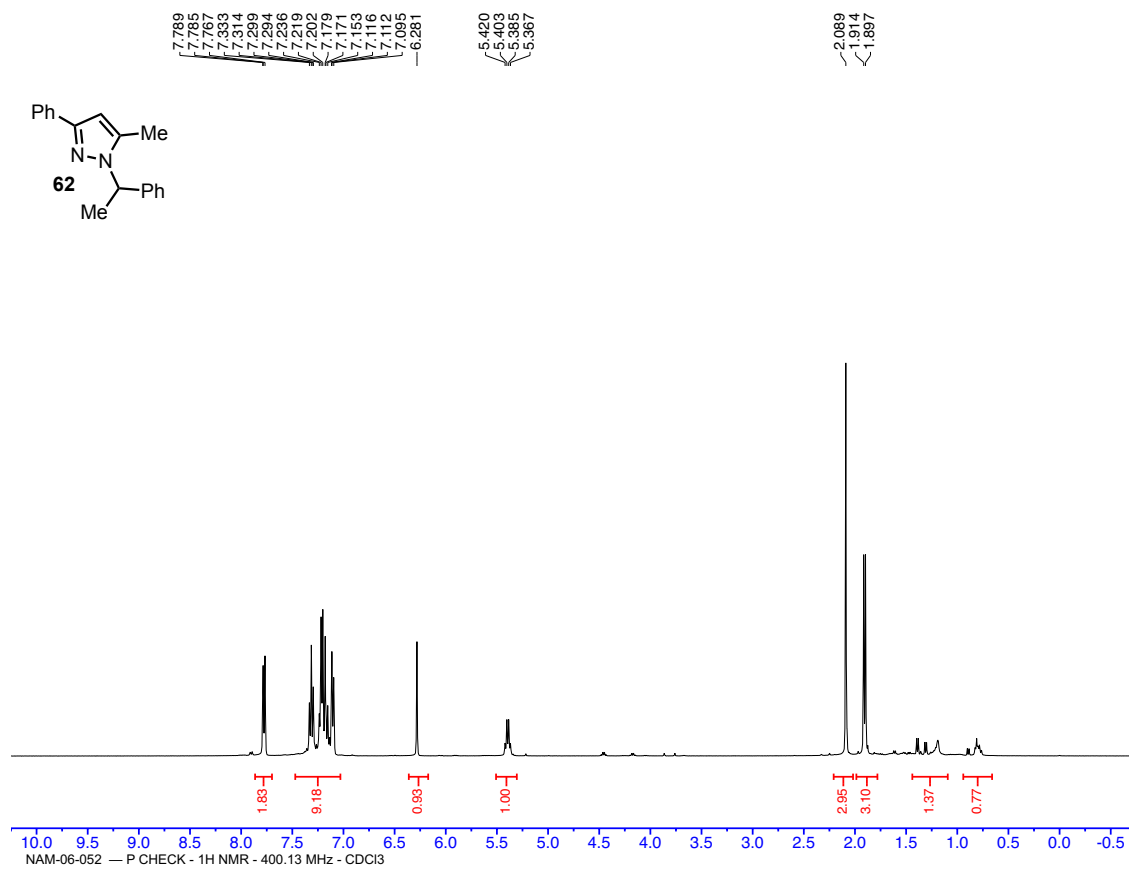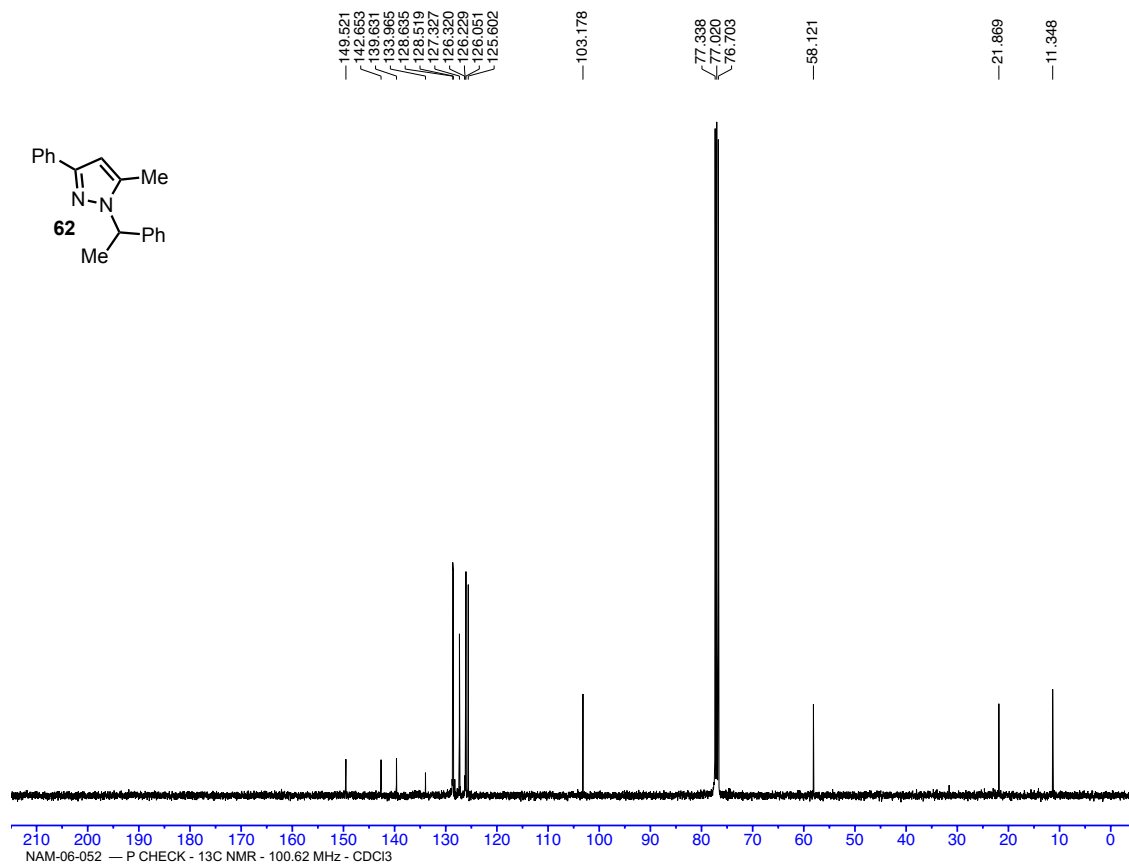

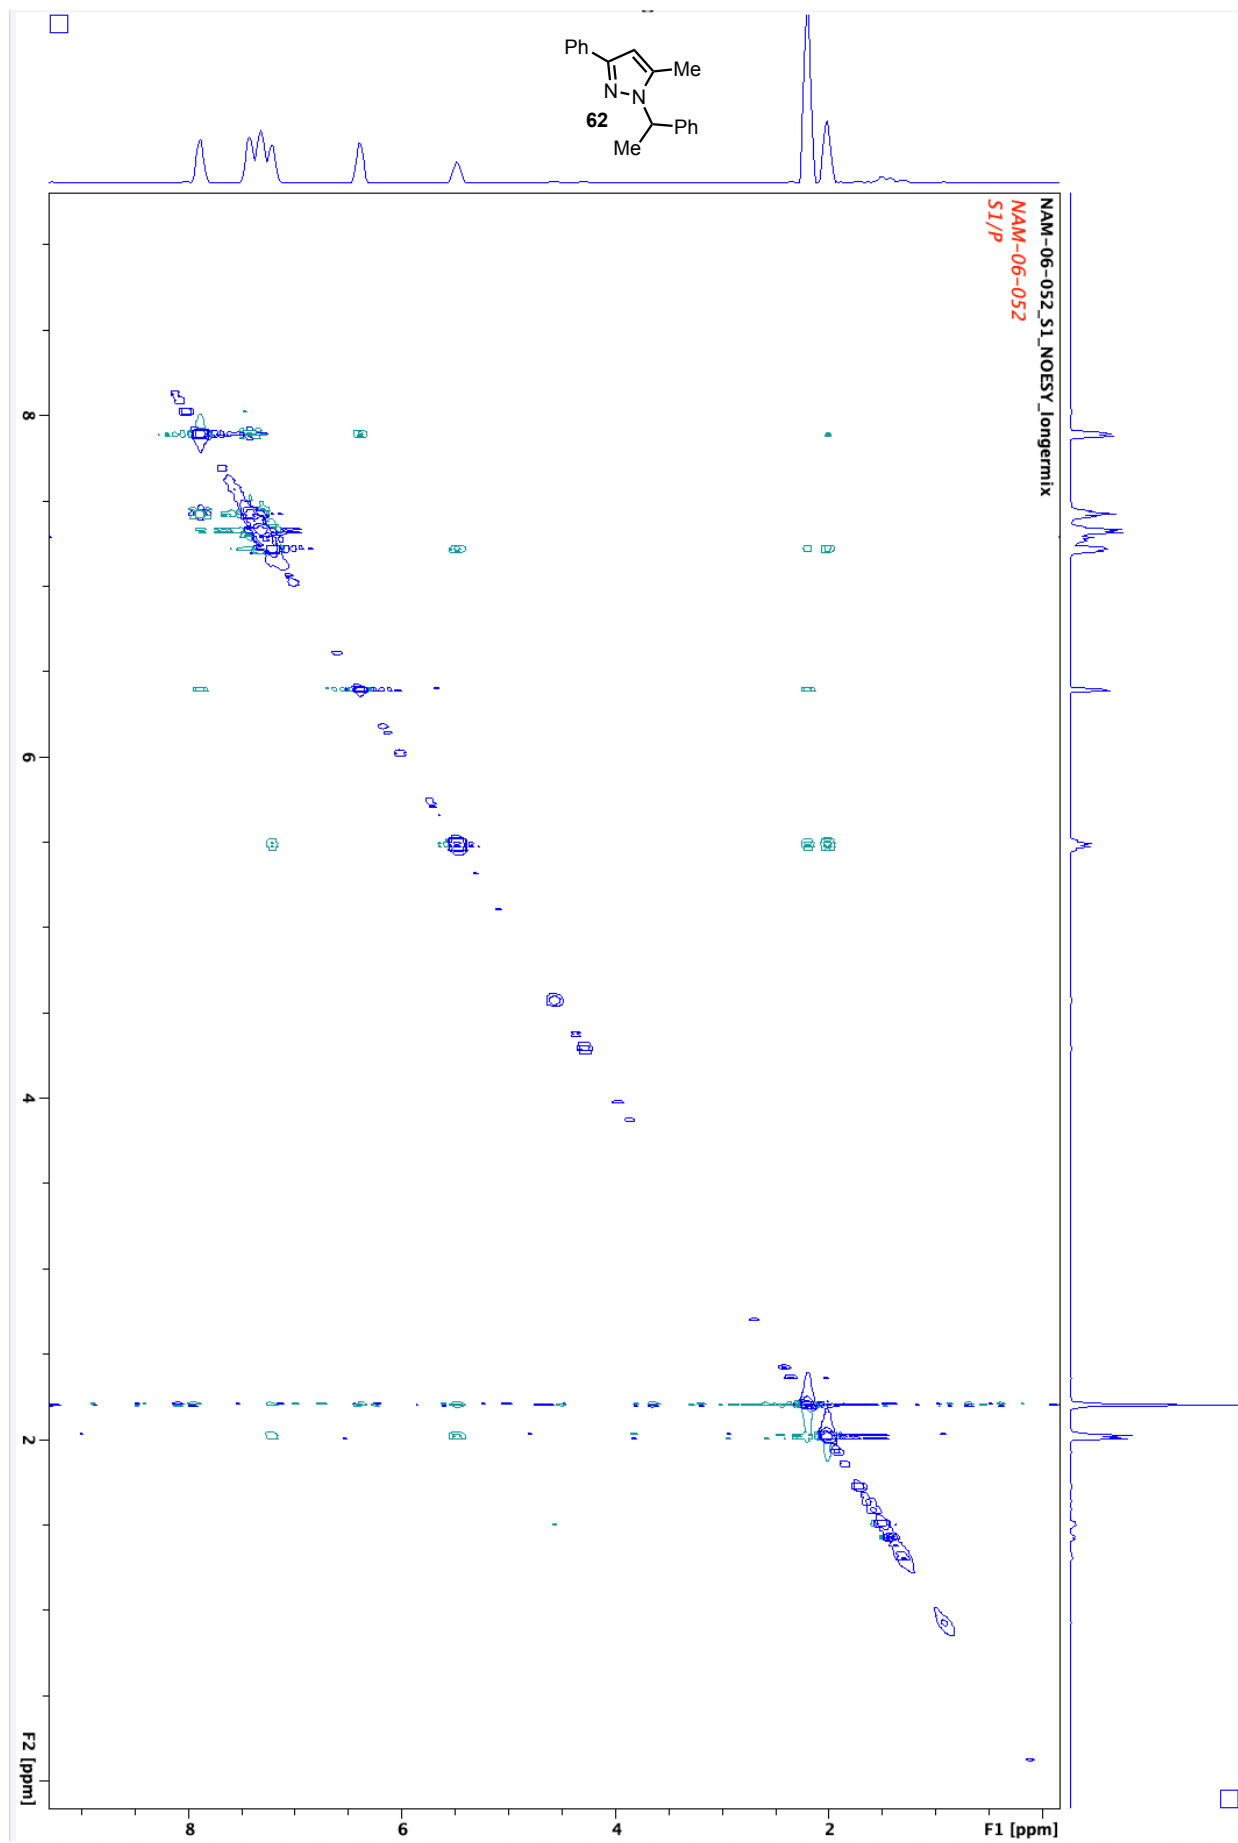

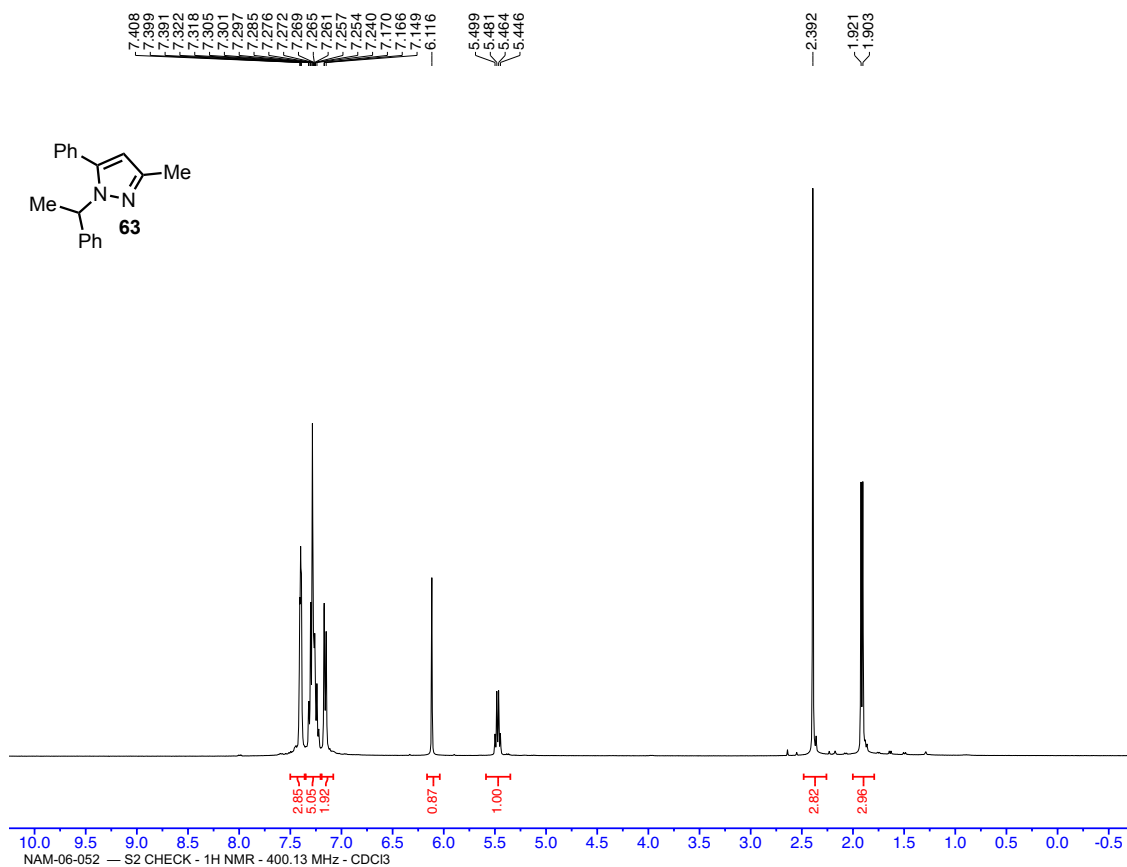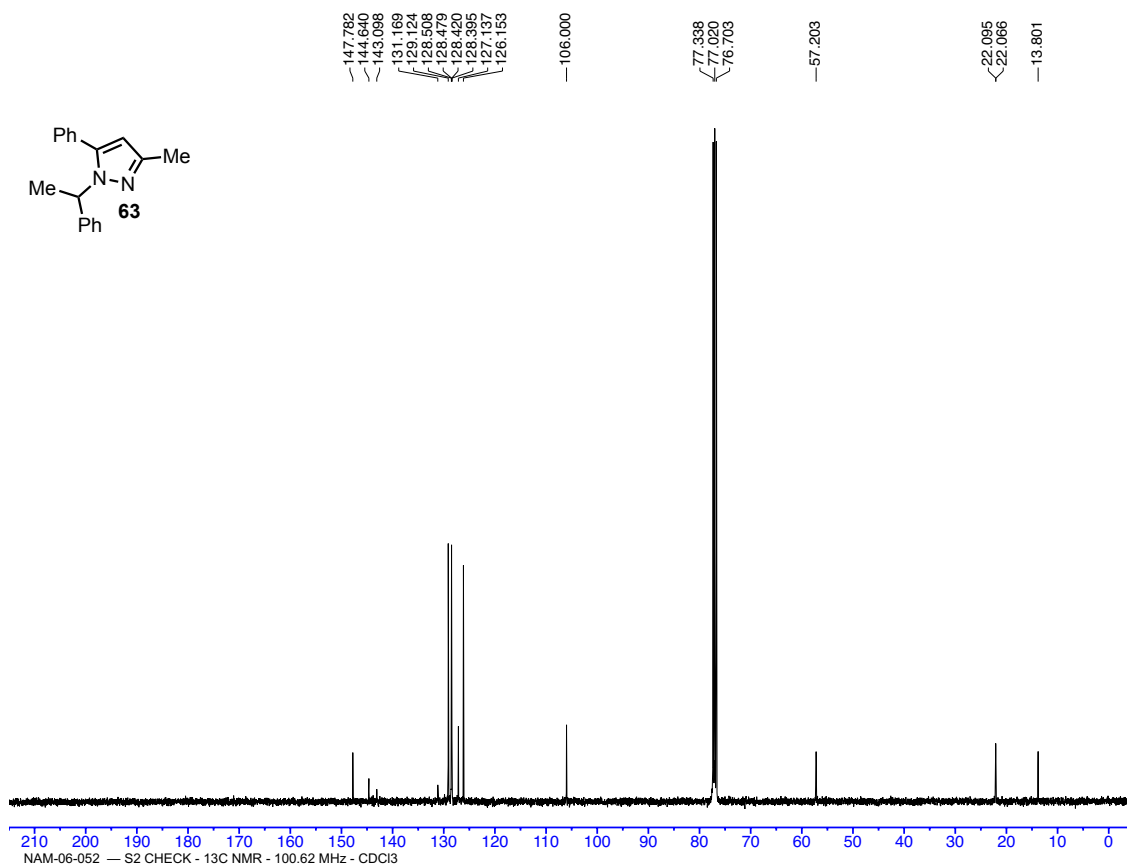

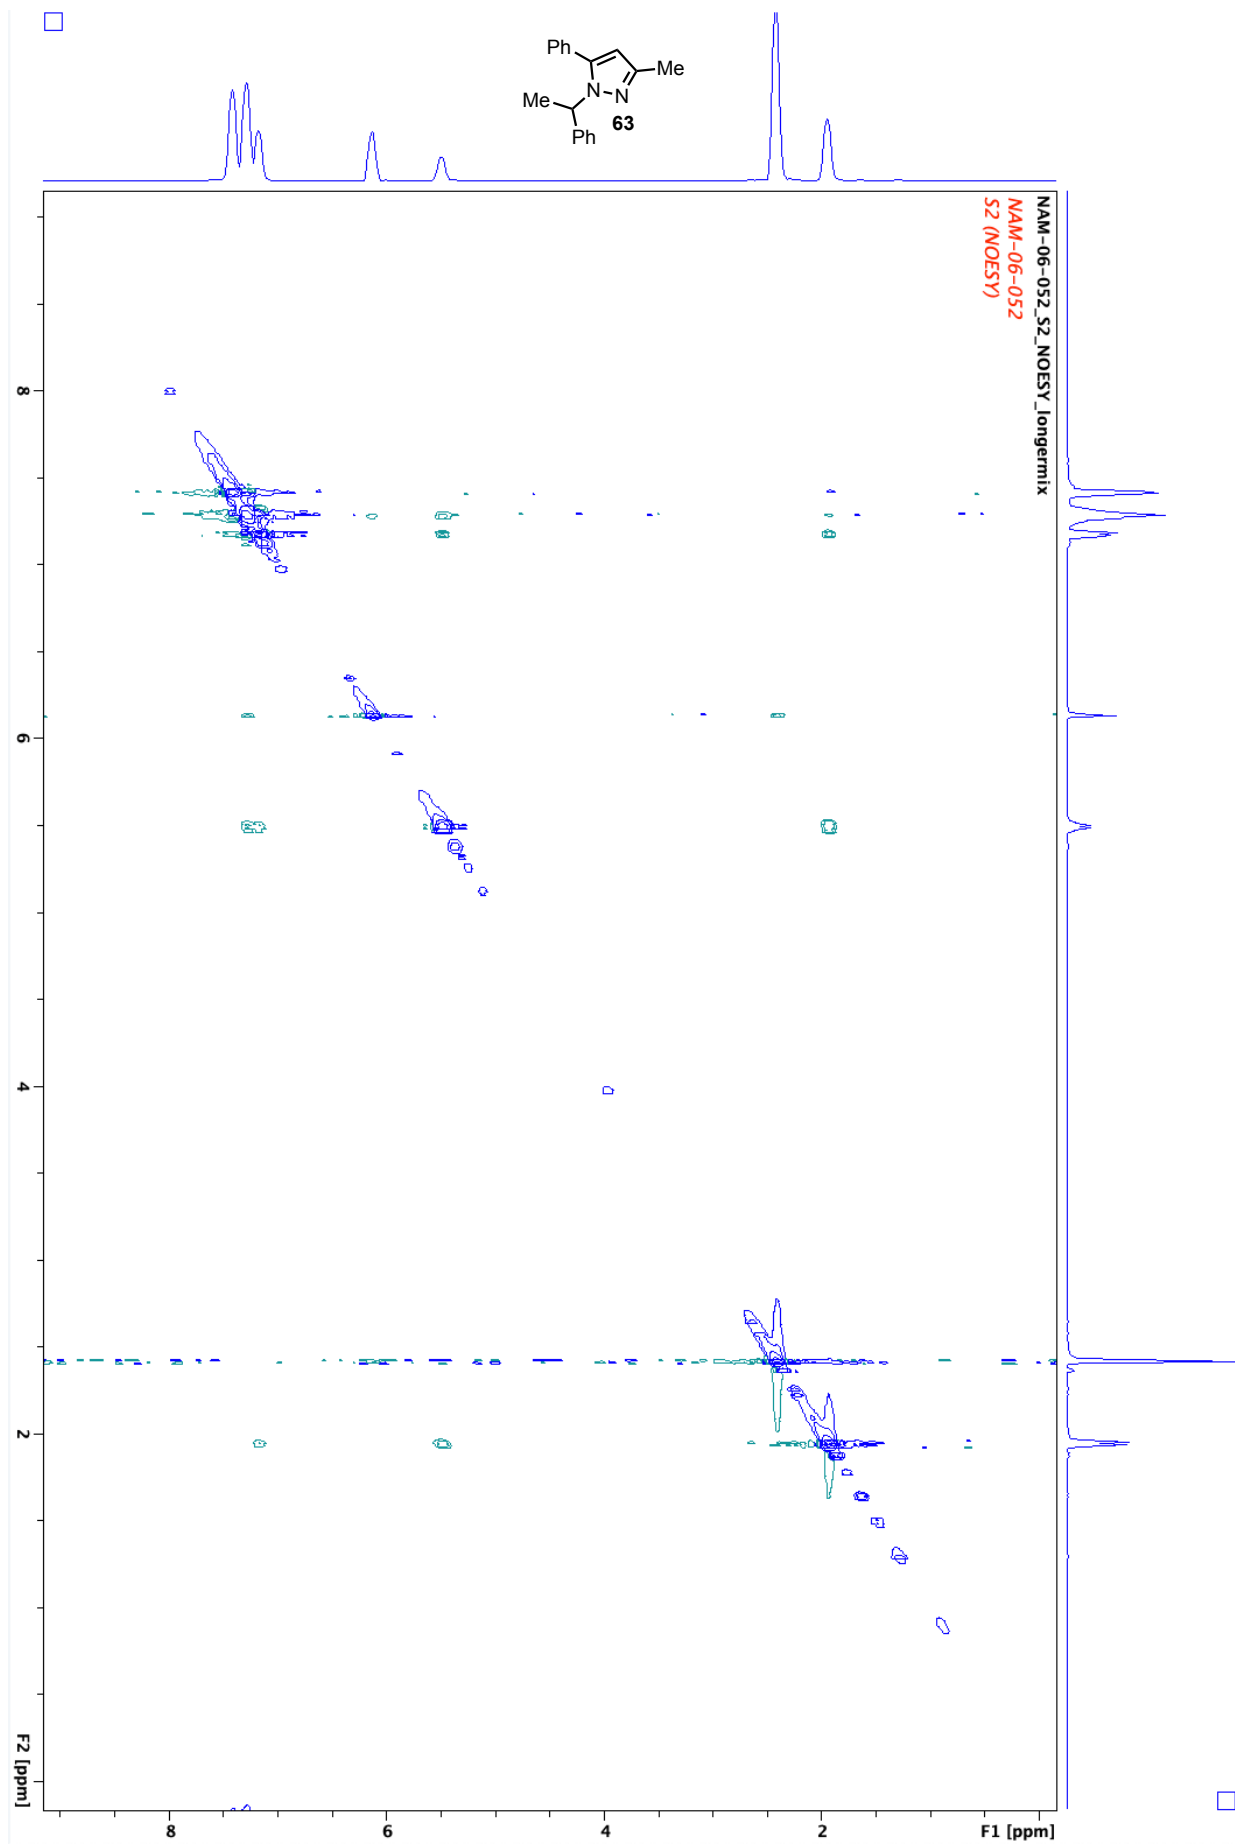

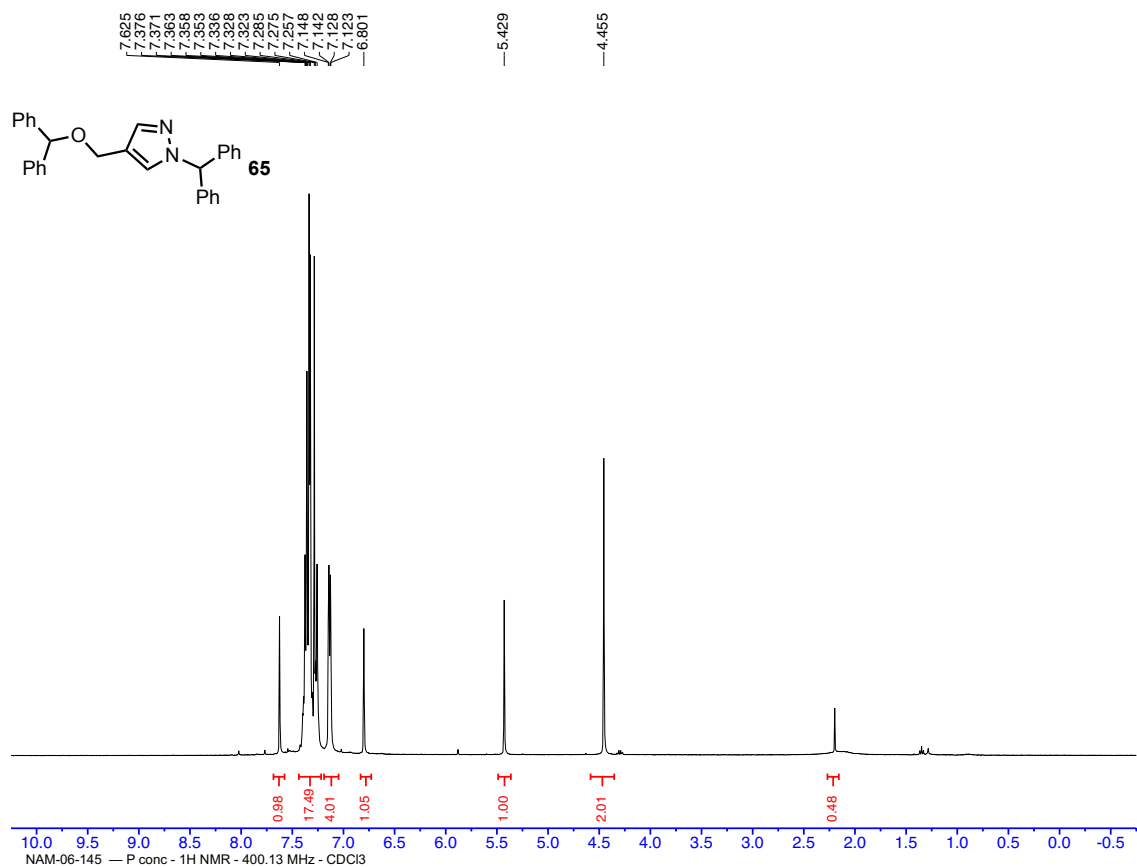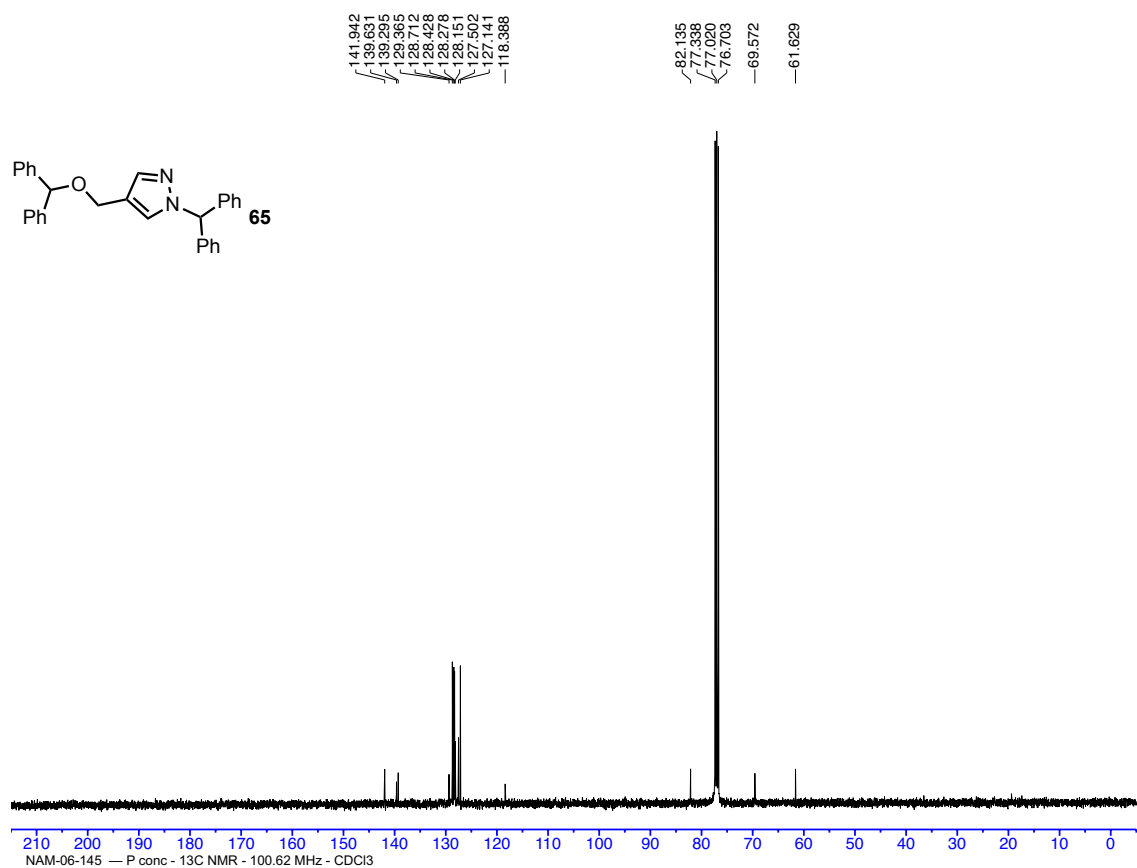

Supplement: s1 [file s1]
